# Supplementary material for: Asymmetric α-amination reaction of alkenyl trifluoroacetates catalyzed by a chiral phosphine–silver complex
Source: Royal Society of Chemistry journal article supplement (doi:10.1039/c3ob42111b), 2014-01-01
Supplement: c3ob42111b.pdf [file c3ob42111b.pdf]

## Supplementary Information

Asymmetric  $\alpha$ -Amination Reaction of Alkenyl Trifluoroacetates Catalyzed by Chiral  
Phosphine-Silver Complex

Akira Yanagisawa\*, Ryoji Miyake, and Kazuhiro Yoshida

Department of Chemistry, Graduate School of Science, Chiba University, Chiba 263-8522, Japan  
ayanagi@faculty.chiba-u.jp

**NMR ( $^1\text{H}$  and  $^{13}\text{C}$ ) and HPLC Charts for Products in Tables 2 and 3**

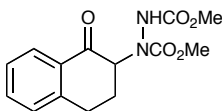

**Dimethyl 1-(1-oxo-1,2,3,4-tetrahydronaphthalen-2-yl)hydrazine-1,2-dicarboxylate (3aa, Table 2, entry 1; Table 3, entry 2).**

<sup>1</sup>H NMR spectra

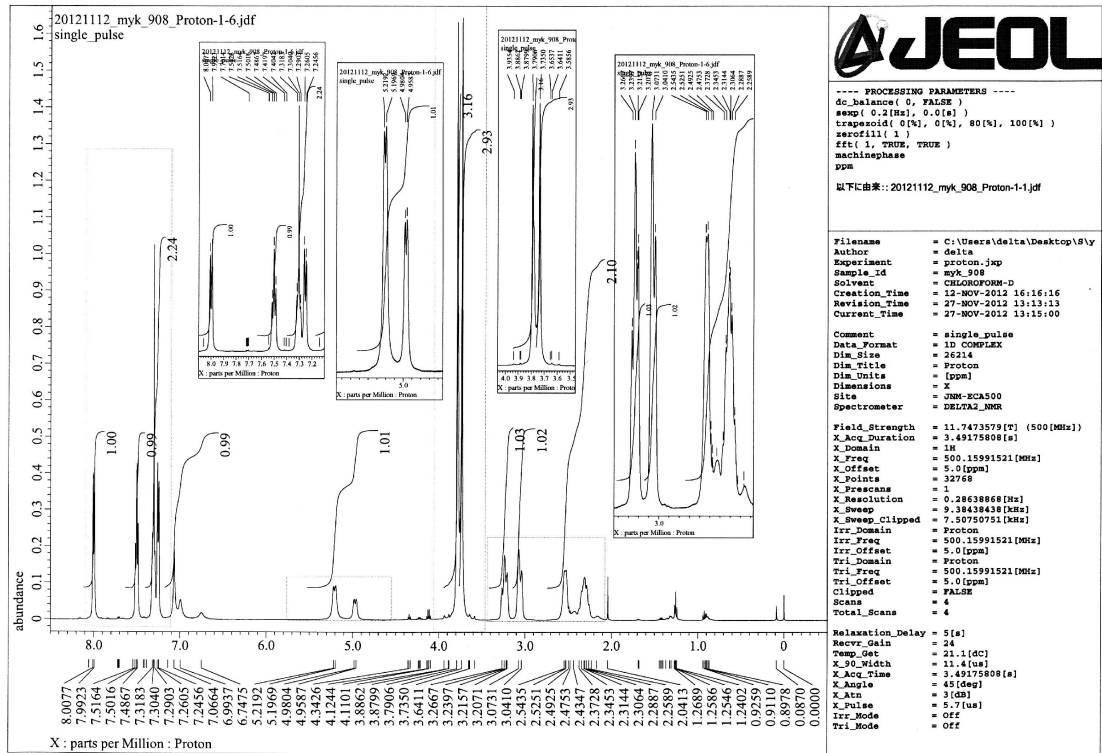

<sup>13</sup>C NMR spectra

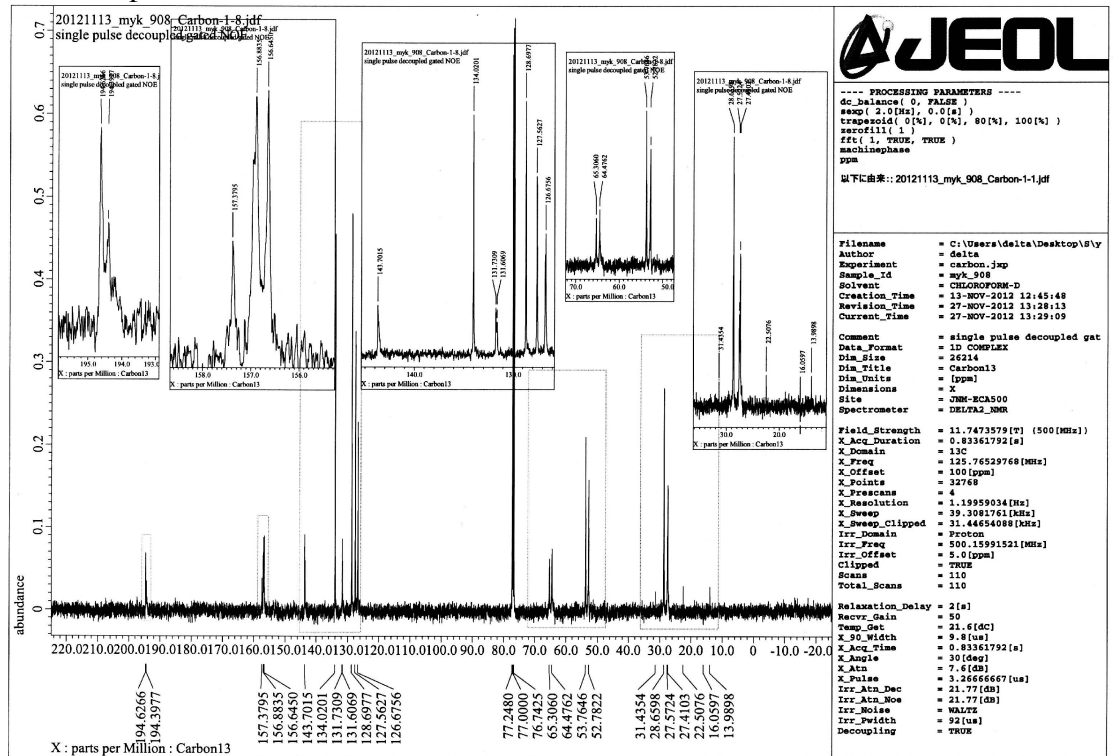



HPLC Chart

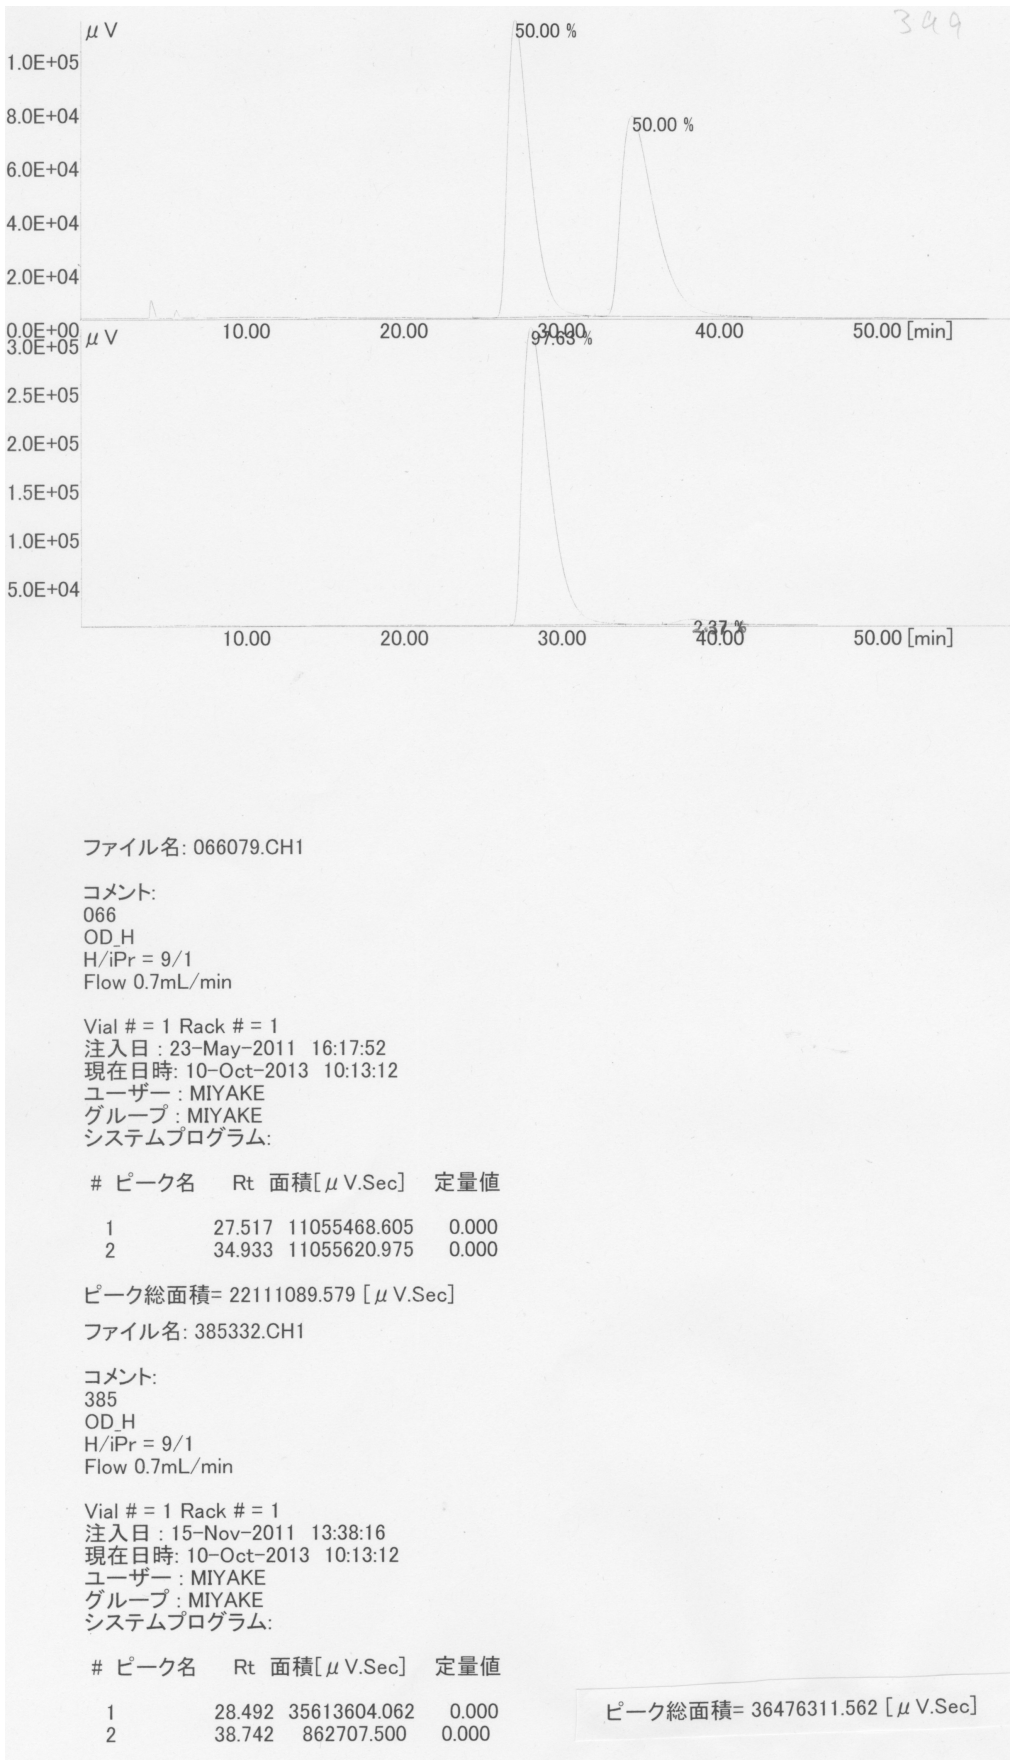

## dicarboxylate (3ab, Table 2, entry 2)

<sup>1</sup>H NMR spectra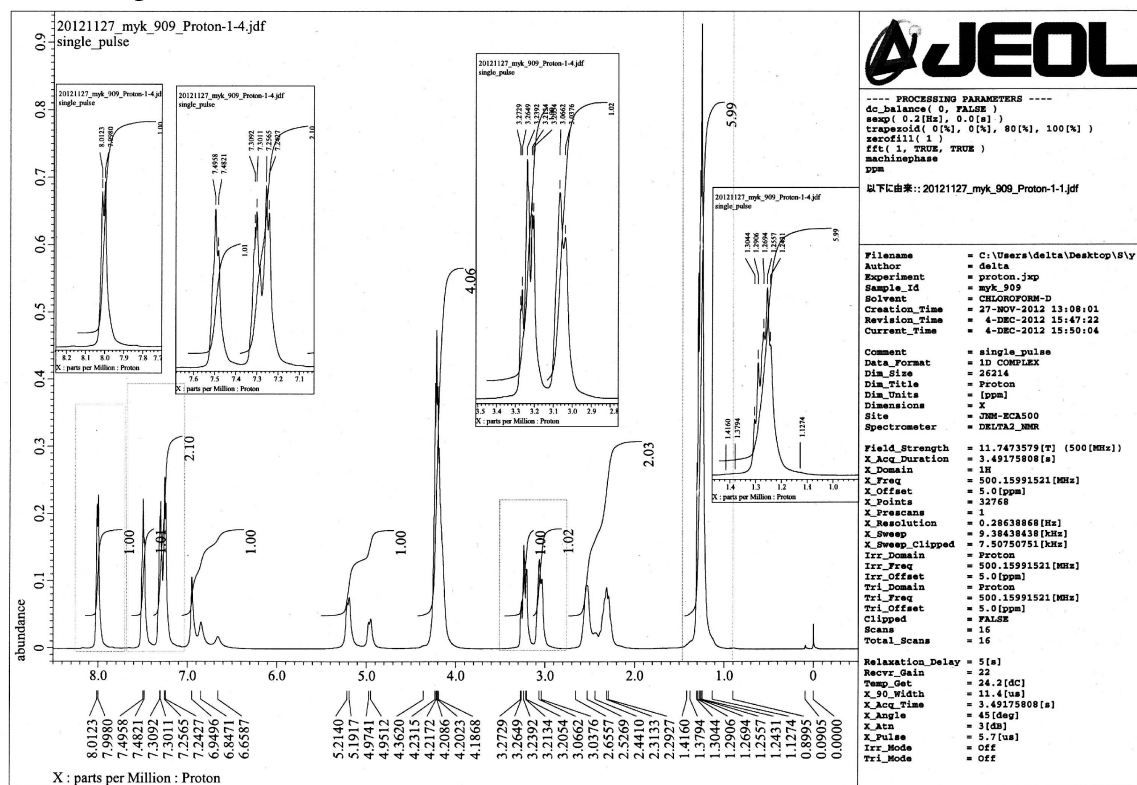<sup>13</sup>C NMR spectra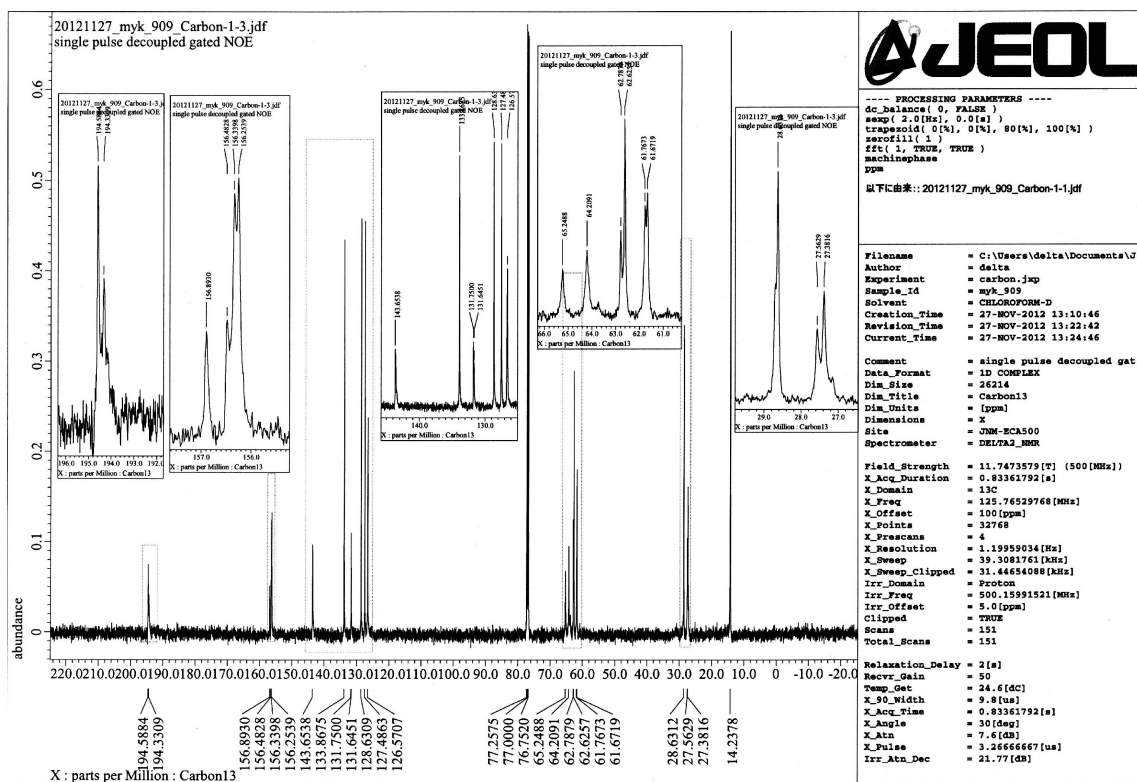

HPLC Chart

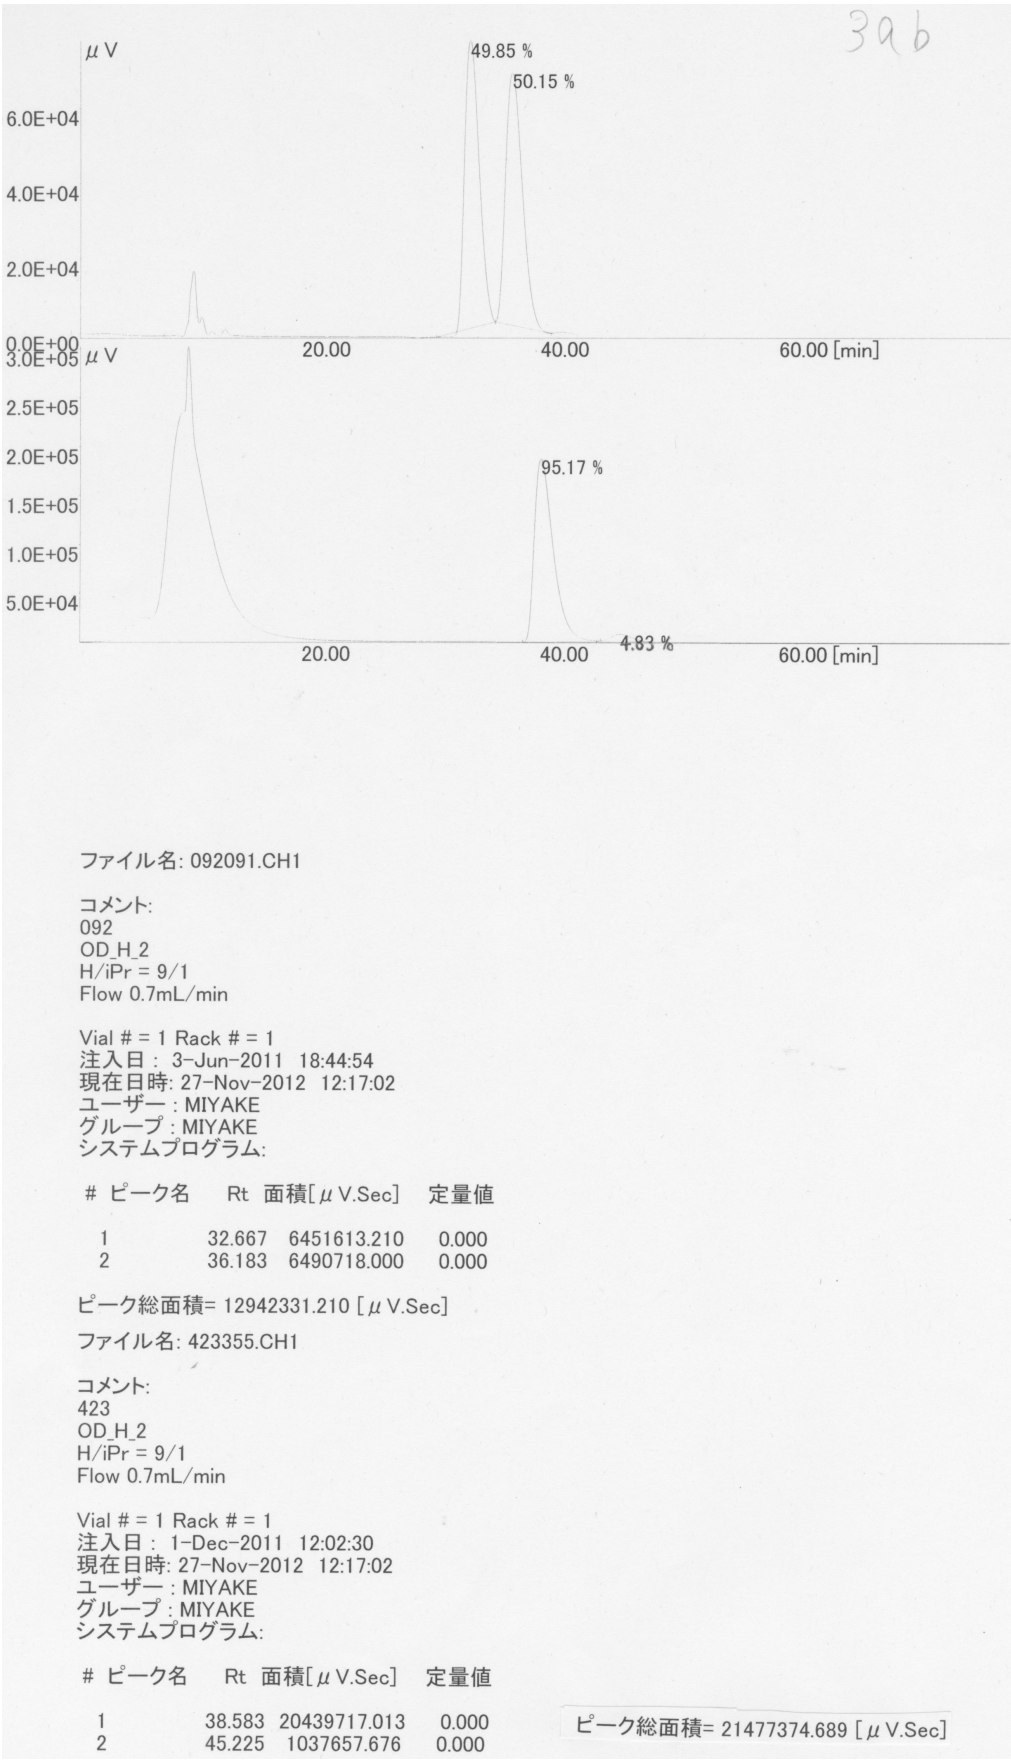



<sup>1</sup>H NMR spectra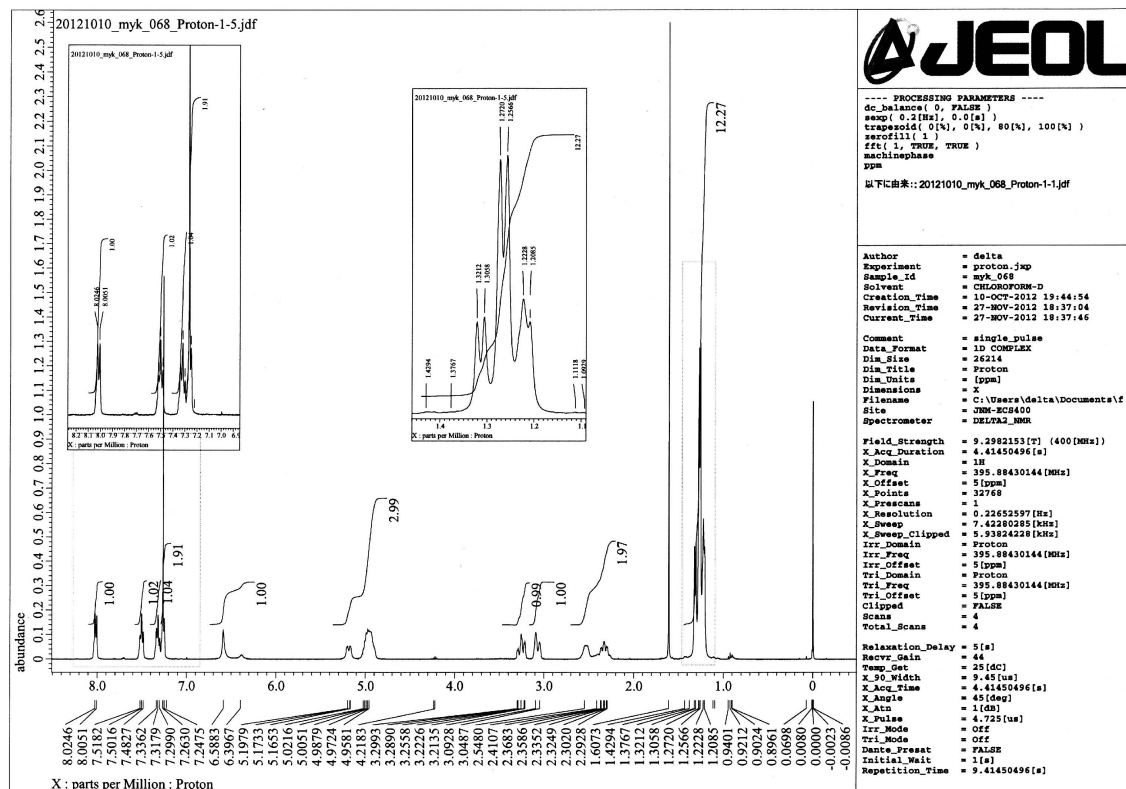<sup>13</sup>C NMR spectra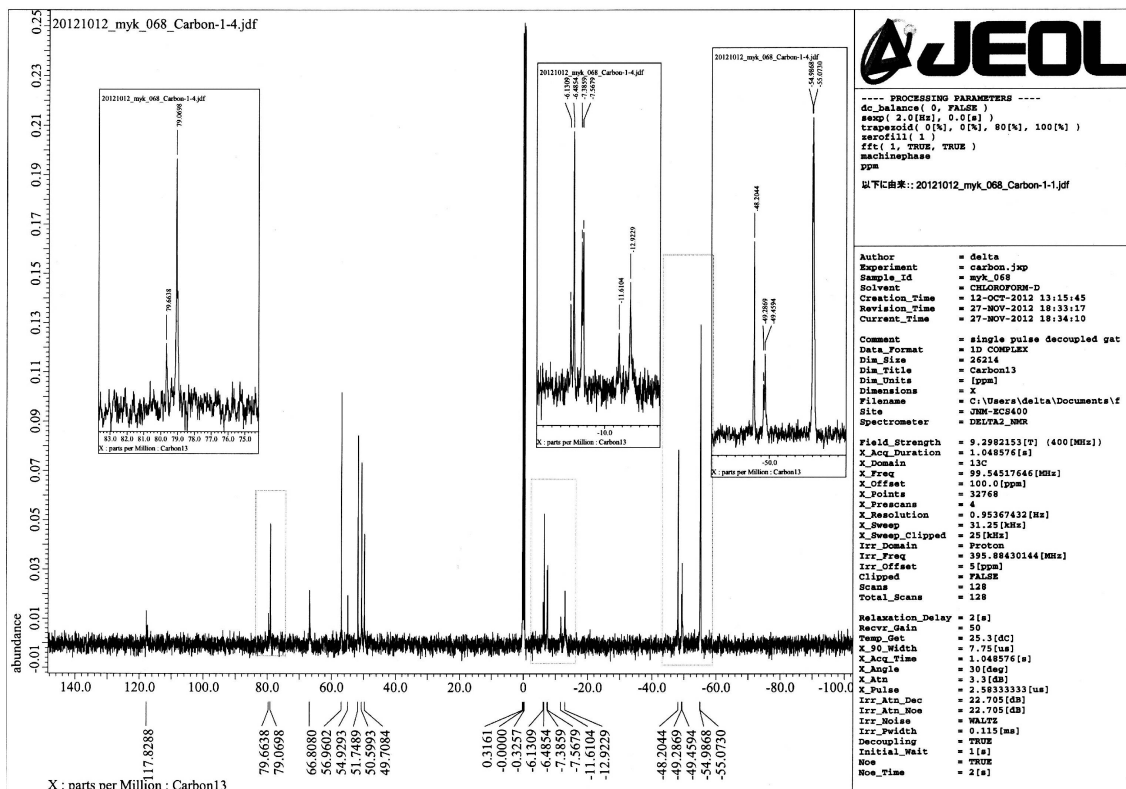

HPLC Chart

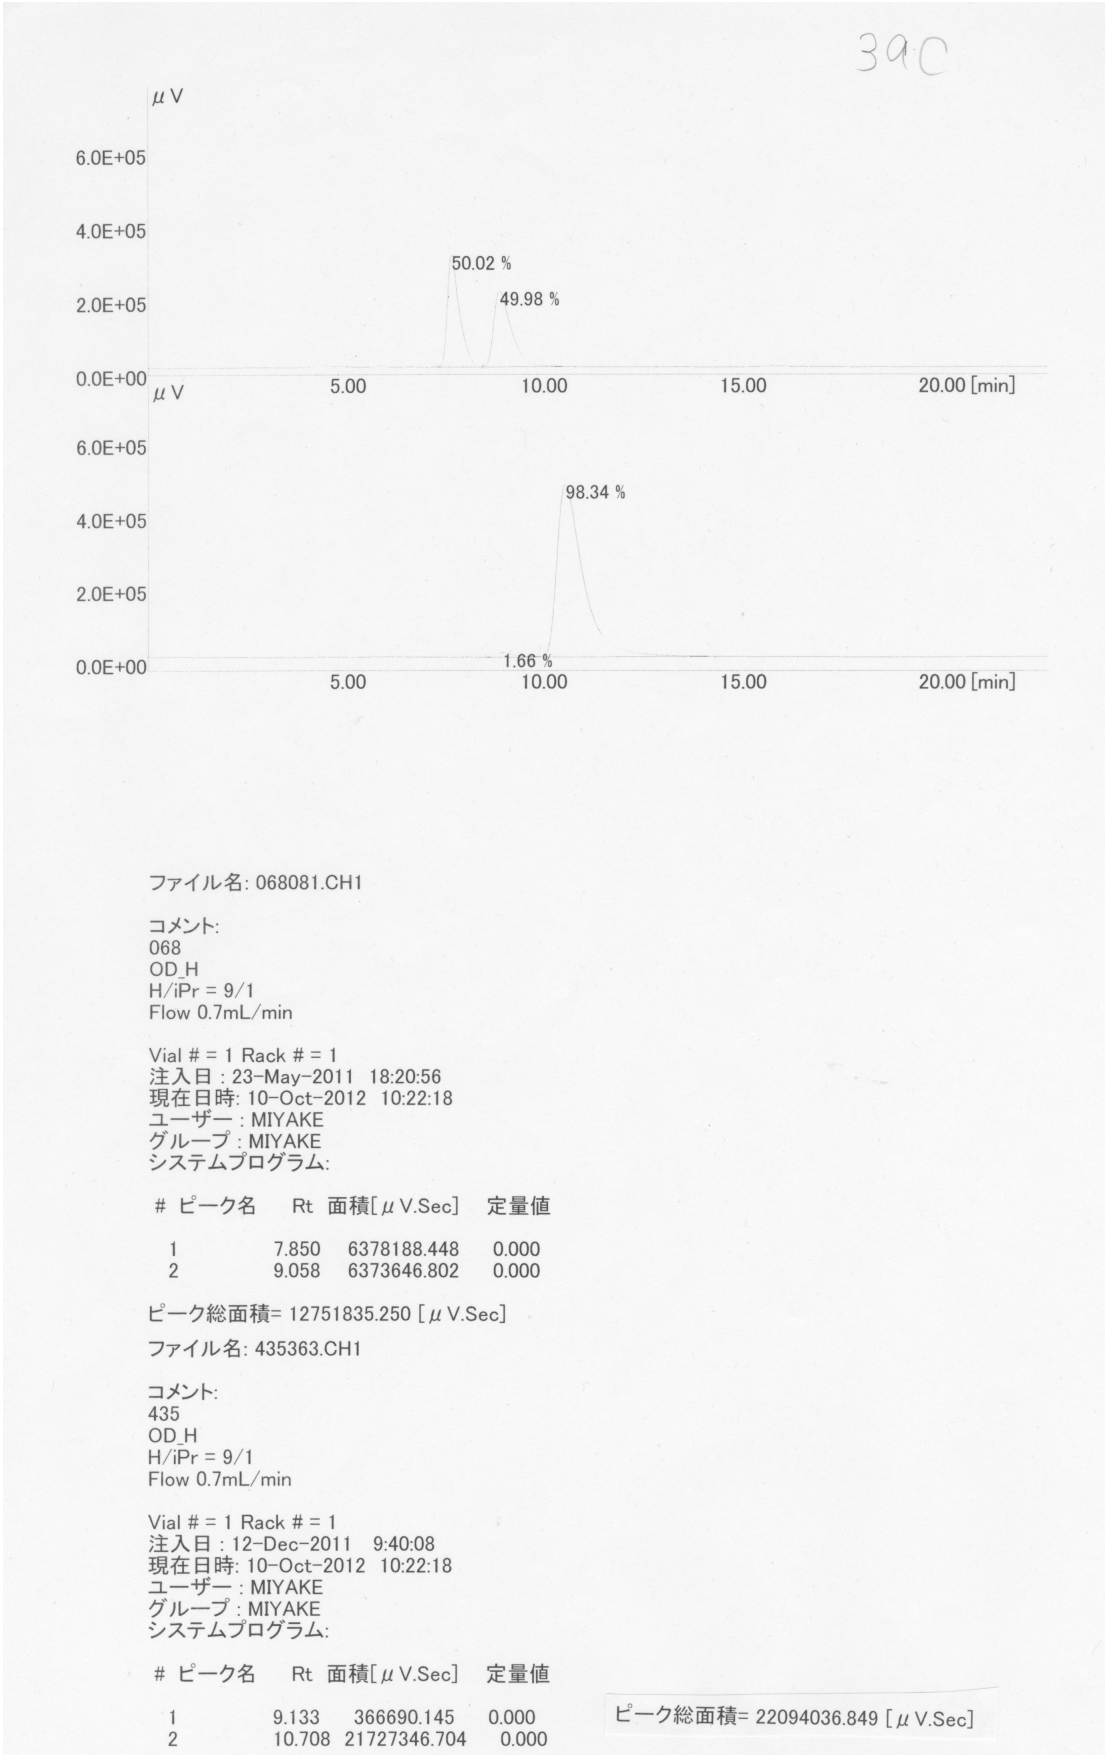

**Dibenzyl 1-(1-oxo-1,2,3,4-tetrahydronaphthalen-2-yl)hydrazine-1,2-dicarboxylate (3ae, Table 2, entry 5)**

20121114\_myk\_913\_Primo-1-6.gdf  
single\_pulse

abundance

9.0 8.0 7.0 6.0 5.0 4.0 3.0 2.0 1.0 0

8.0020  
7.9865  
7.5021  
7.4878  
7.4729  
7.3172  
7.2920  
7.2456  
7.0790  
6.9393  
6.8763  
6.6495  
5.1997  
5.1659  
5.1413  
5.0606  
5.0365  
4.9839  
4.9547  
3.2712  
3.2437  
3.2105  
3.1756  
3.1408  
3.0993  
2.5664  
2.5463  
2.3305  
2.3076  
2.06  
1.2568  
0.8801  
0.0779  
0.0000

1.00  
1.24  
0.88  
5.32  
1.04  
1.04  
1.05  
2.06

X: parts per Million - Proton

```

##### PROCESSING PARAMETERS #####
dc.balance (0, FALSE)
smp 0.2[Hz], 0.0[s]
troughed: 0[N], 0[N], 80[N], 100[N]
zerofill(1)
fft(1, TRUE, TRUE)
machinesphase
ppm

以下由由来: 20121114_myk_913_Proton-1-1.jdf

Filename = C:\Users\delta\Desktop\A\
Author = delta
Experiment = protonen_jmp
Sample_id = myk_913
Solvent = CHLOROFORM-D
Creation_Time = 14-NOV-2013 19:19:15
Revision_Time = 27-NOV-2012 14:03:19
Current_Time = 27-NOV-2012 14:07:23

Comment = single_pulse
Data_Format = ID COMPLEX
Dir_Path =
Dir_Size = 26214
Dir_Title = Proton
Dir_Units = [ppm]
Dimensions =
Site = JNM-ECA500
Spectrometer = DELTA2X_NMR

Field_Strength = 11.7473579[T] (500[MHz])
X_Acq_Duration = 1H1759808[s]
X_Domain = 19
X_Freq = 500.15991521[MHz]
X_Pulse = 5.0[ppm]
X_Points = 32768
X_Prescans = 1
X_Resolution = 0.28638866[Hz]
X_Sweep = 9.38438438[kHz]
X_Sweep_Clippped = 7.50750751[kHz]
X_Domain = Proton
Irr_Freq = 500.15991521[MHz]
Irr_Offset = 5.0[ppm]
Irr_Domain = Proton
Tri_Freq = 500.15991521[MHz]
Tri_Offset = 5.0[ppm]
Tri_Clippped = 5.0[ppm]
Scans = 4
Total_Scans = 4

Relaxation_Delay = 5[s]
Nucvcr_Gain = 32
Temp_Set = 32.3[°C]
X_90_Width = 1.442[us]
X_90_Time = 3.49575808[s]
X_Angle = 30[°]
X_Atn = 3[dB]
X_Pulse = 5.7[us]
Irr_Mode = Z
Tri_Mode = Off

```

**20121025\_msk\_427\_Carbon-1-4.jdf**

Abundance vs. X: parts per Million : Carbon13

Labeled Peaks (m/z):

- 94.5505
- 94.3014
- 156.7657
- 156.5645
- 156.1813
- 143.7461
- 143.6790
- 135.7369
- 135.5453
- 134.0891
- 131.8186
- 128.7624
- 128.4846
- 128.3643
- 127.9872
- 127.6703
- 127.5170
- 126.7889
- 77.3161
- 77.2012
- 77.0000
- 76.6743
- 68.6747
- 68.2915
- 67.6592
- 67.5538
- 65.4749
- 64.4785
- 28.7344
- 27.6805
- 27.5081

Inset 1 (Top Left): 196.0, 194.0, 196.5614, 194.5505

Inset 2 (Top Middle): 156.7657, 156.5645, 156.1813

Inset 3 (Top Right): 143.7461, 143.6790

Inset 4 (Middle): 136.0, 134.0, 136.0891, 134.0896

Inset 5 (Bottom Right): 70.0, 68.0, 70.0000, 68.2915, 67.6592, 65.4749, 64.4785

```

----- PROCESSING PARAMETERS -----
dc_balance! 0, FALSE
amp! 2.0[Hz], 0.5[Hz]
treshold! 0[Hz], 0[N], 80[N], 100[N]
zerofill! 1
fft! 1, TRUE, TRUE
machinphase
ups

以下に由来： 20121025_mysk_427_Carboten-1-1.jdf

Author = delta
Experiment = carboten_jmp
Sample_ID = mysk_427
Solvent = CHLOROFORM-D
Revision_time = ORG-2012 21:07:07
Revision_time = 27-MOV-2012 18:29:09
Current_time = 27-MOV-2012 18:30:47

Comment = single pulse decoupled gat
Data_Format = 1D COMPLEX
Dir_Path = C:\Users\delta\Documents\1f
Dir_Unit = CHLOROACID
Dimensions = DELTA72_BMRK
Filebase = C:\Users\delta\Documents\1f
Spectrometer = DELTA72_BMRK

Field_Strength = 9.29825153 [7] 400[MHz]
X_Acq_Rotation_Delay = 1.048576[s]
X_Domain = 35
X_Offset = 99.54517646[MHz]
X_Fpoints = 127.00[pptm]
X_Prescans = 4
X_Resolution = 0.95367432[Hz]
X_Sweep = 31.25 [Hz/s]
X_Sweep_Clippped = 25 [Hz]
Xrr_Domain = 35
Xrr_Offset = 995.88430144[MHz]
Xrr_Clipped = 25 [ppm]
Scans = 372
Total_Scans = 372

Relaxation_Delay = 2[s]
Recur_Dein = 2[s]
Temp_Opt = 8.0[°C]
X90_Width = 7.75 [us]
X_Acq_Time = 48.64576[s]
X_Angle = 30[deg]
X_Atn = 3.3[db]
X_Pulse = 18.833333[us]
Xrr_Acta_Dec = 22.705 [dB]
Xrr_Acta_Nuc = 22.705 [dB]
Xrr_Raise = 22.705 [dB]
Xrr_Fwidth = 0.115[mHz]
Decoupling = TRUE
Initial_Wait = 1[s]
Noise = TRUE
Now_Time = 2[s]

```



HPLC Chart

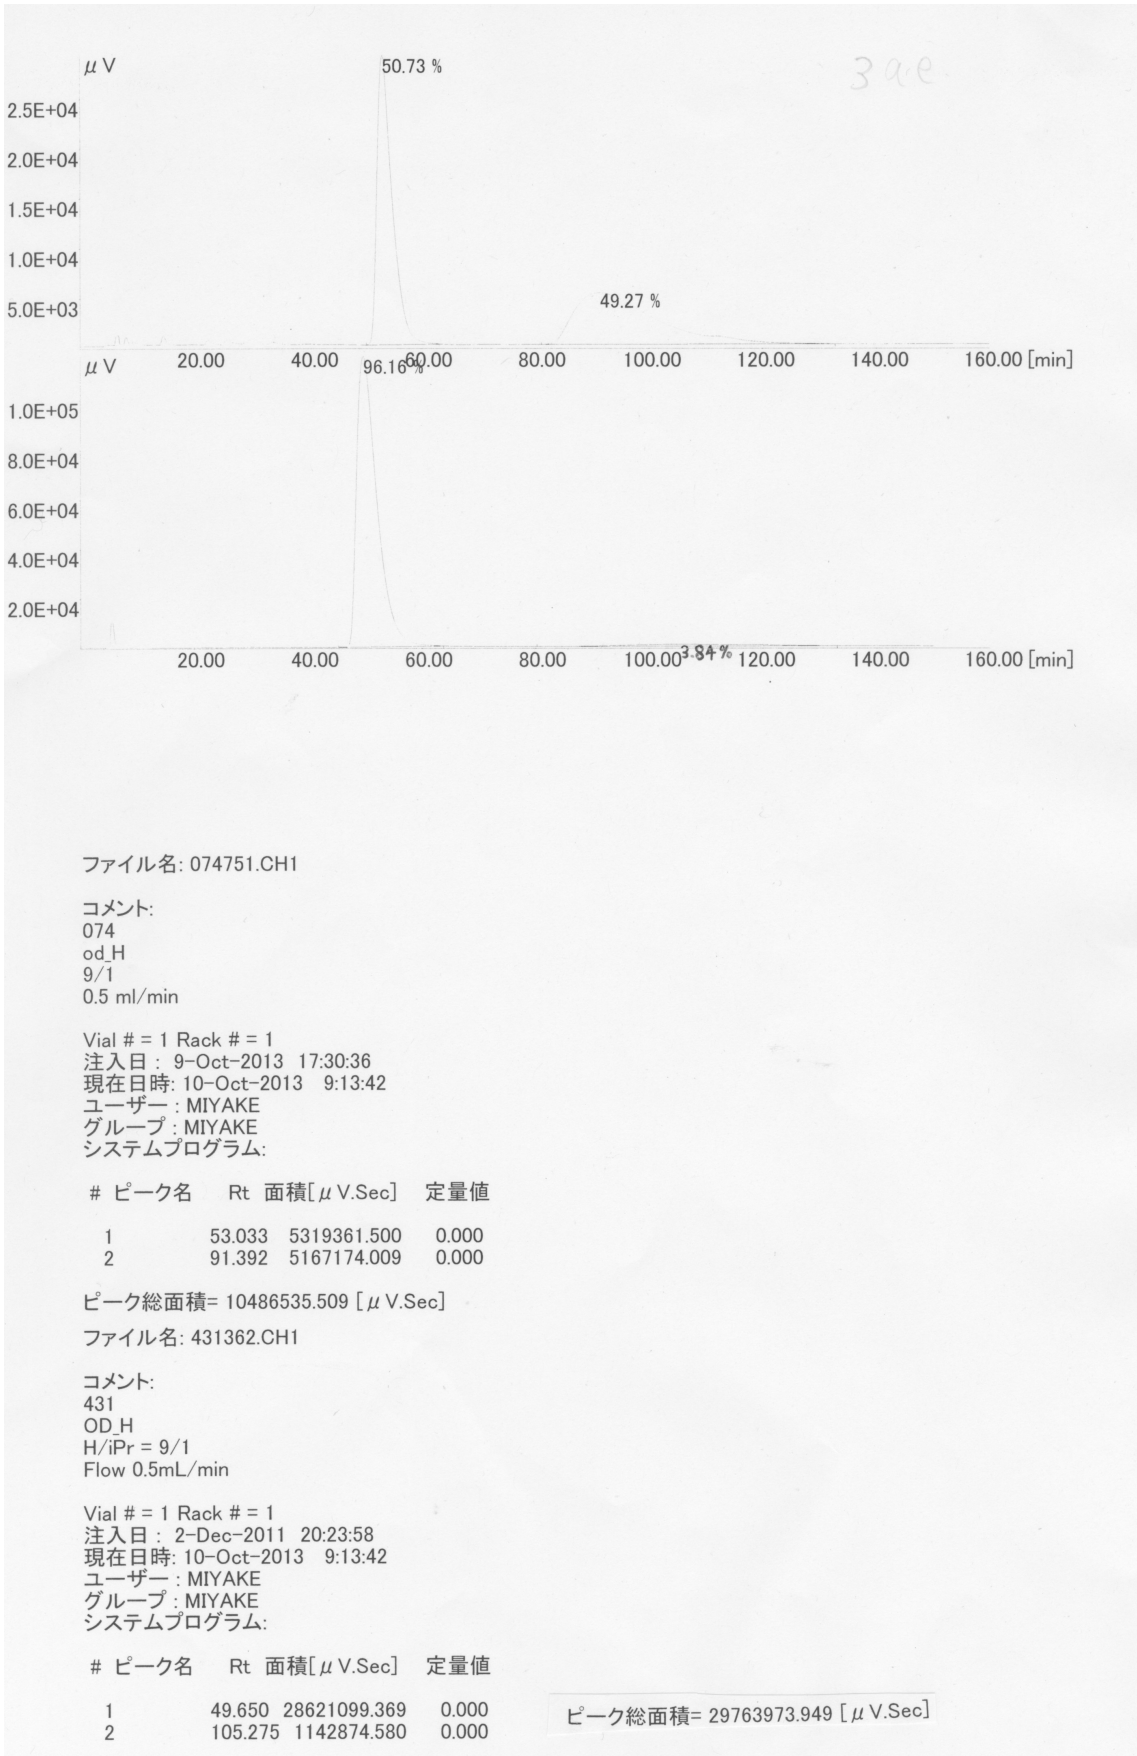

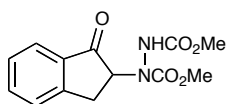

Dimethyl 1-(1-oxo-2,3-dihydro-1H-inden-2-yl)hydrazine-1,2-dicarboxylate  
(3ba, Table 3, Entry 1)

<sup>1</sup>H NMR spectra

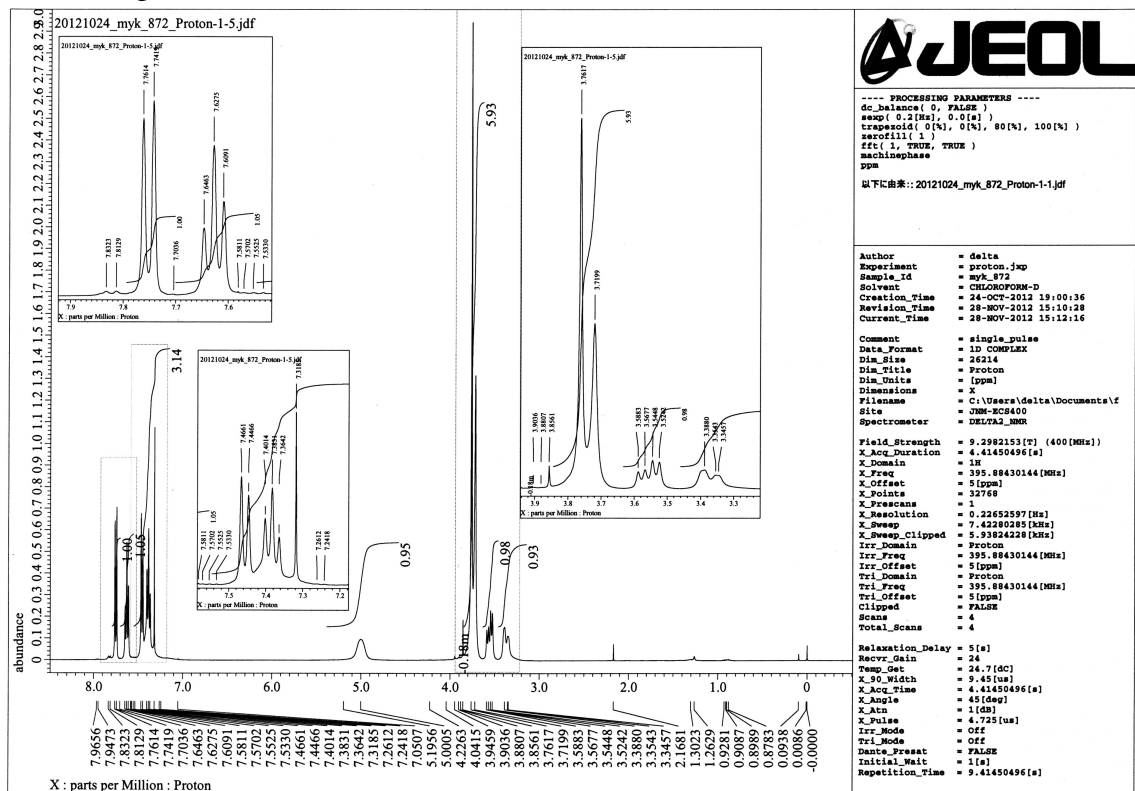

<sup>13</sup>C NMR spectra

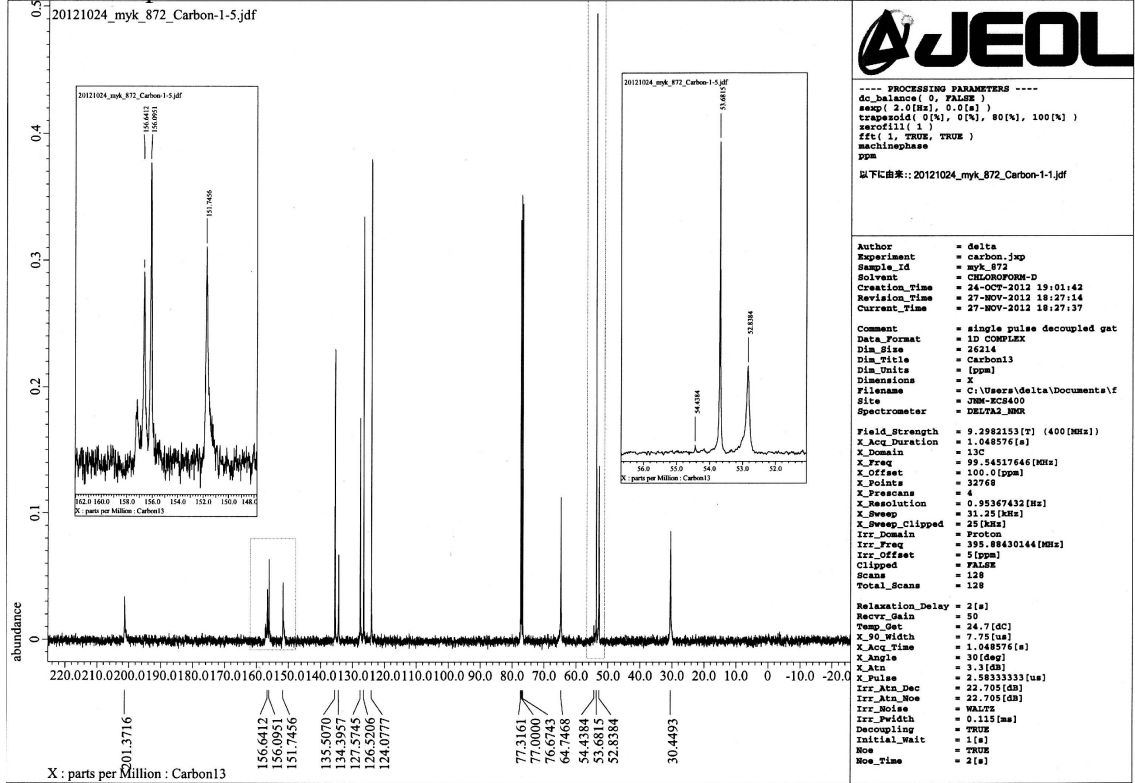

HPLC Chart

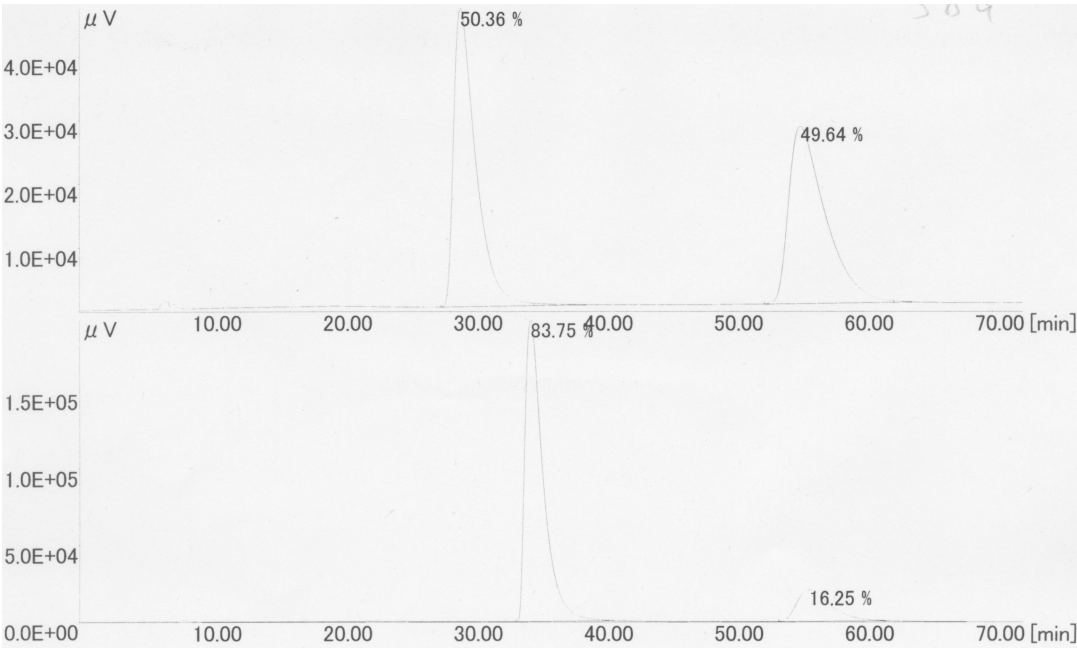

ファイル名: 398750.CH1

コメント:

398

od\_H

9/1

1.0 ml/min

Vial # = 1 Rack # = 1

注入日: 9-Oct-2013 16:08:28

現在日時: 10-Oct-2013 10:09:34

ユーザー: MIYAKE

グループ: MIYAKE

システムプログラム:

| # | ピーク名 | Rt     | 面積[ $\mu$ V.Sec] | 定量値   |
|---|------|--------|------------------|-------|
| 1 |      | 29.192 | 5458424.021      | 0.000 |
| 2 |      | 55.283 | 5379428.912      | 0.000 |

ピーク総面積= 10837852.933 [ $\mu$  V.Sec]

ファイル名: 444380.CH1

コメント:

445

OD\_H

H/iPr = 9/1

Flow 1.0mL/min

Vial # = 1 Rack # = 1

注入日: 13-Dec-2011 16:35:38

現在日時: 10-Oct-2013 10:09:34

ユーザー: MIYAKE

グループ: MIYAKE

システムプログラム:

| # | ピーク名 | Rt     | 面積[ $\mu$ V.Sec] | 定量値   |
|---|------|--------|------------------|-------|
| 1 |      | 34.567 | 18837725.500     | 0.000 |
| 2 |      | 55.908 | 3654452.000      | 0.000 |

ピーク総面積= 22492177.500 [ $\mu$  V.Sec]



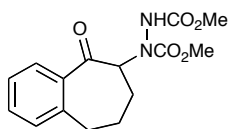

**Dimethyl 1-(5-oxo-6,7,8,9-tetrahydro-5H-benzo[7]annulen-6-yl)hydrazine-1,2-dicarboxylate (3ca, Table 3, entry 4)**

<sup>1</sup>H NMR spectra

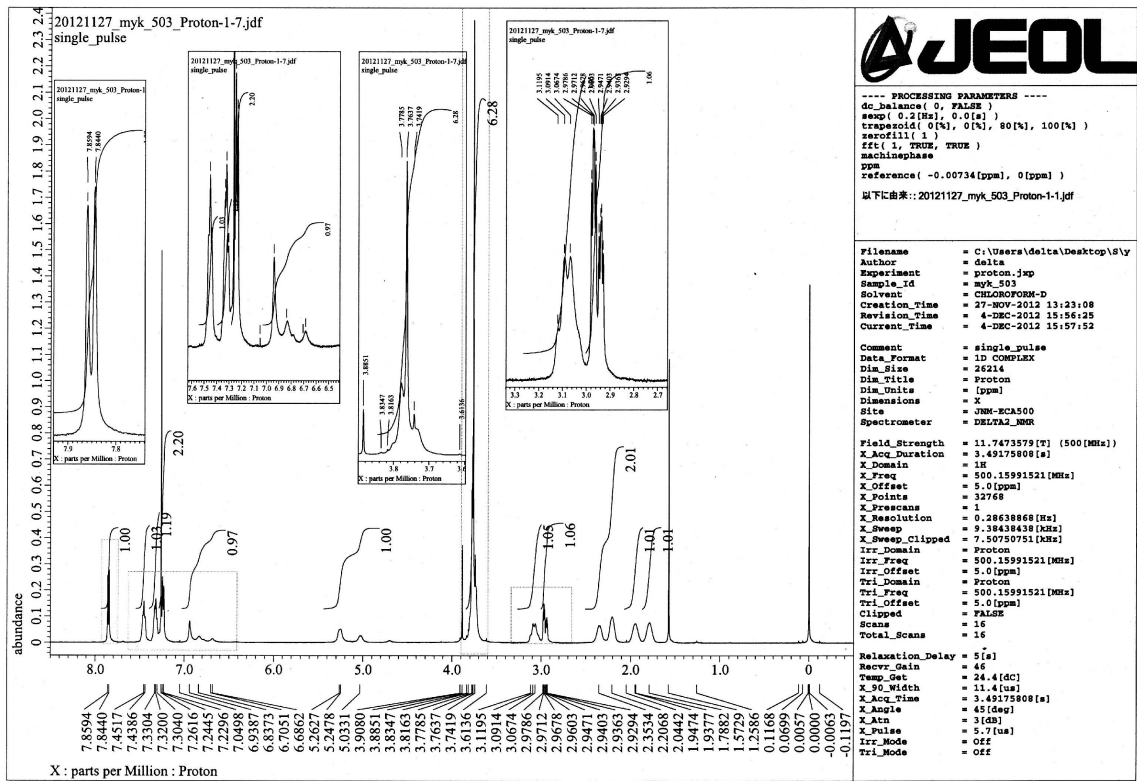

<sup>13</sup>C NMR spectra

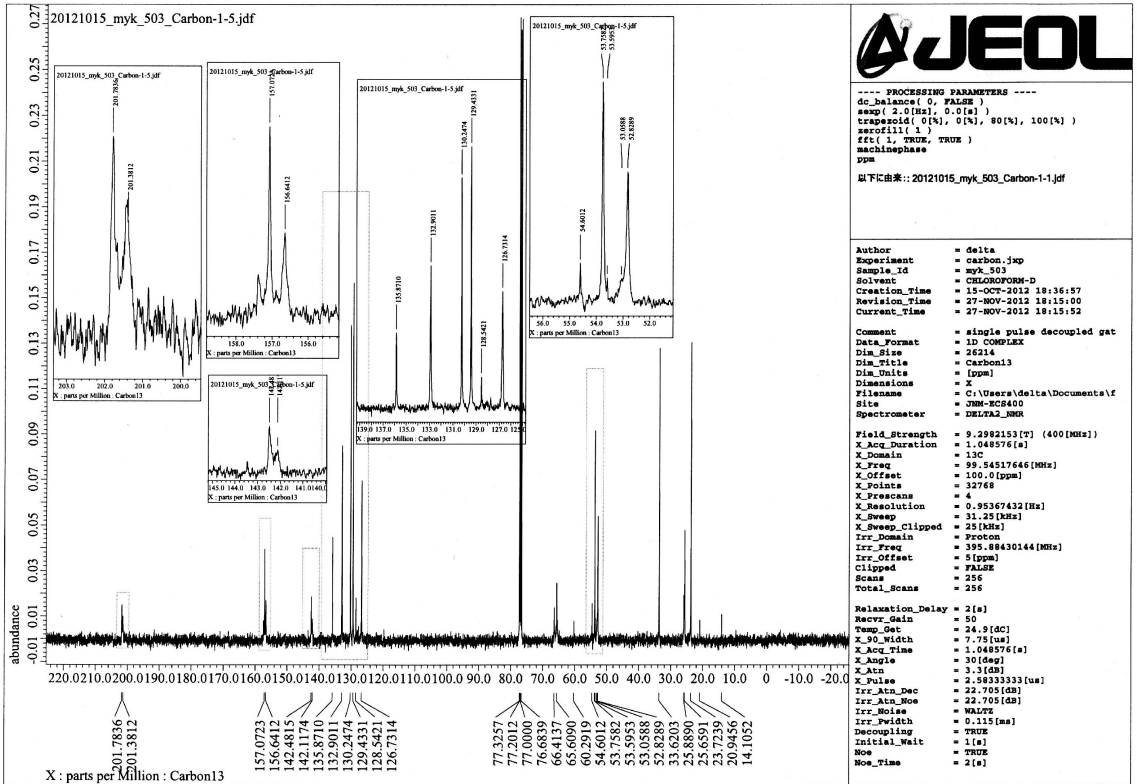

HPLC Chart

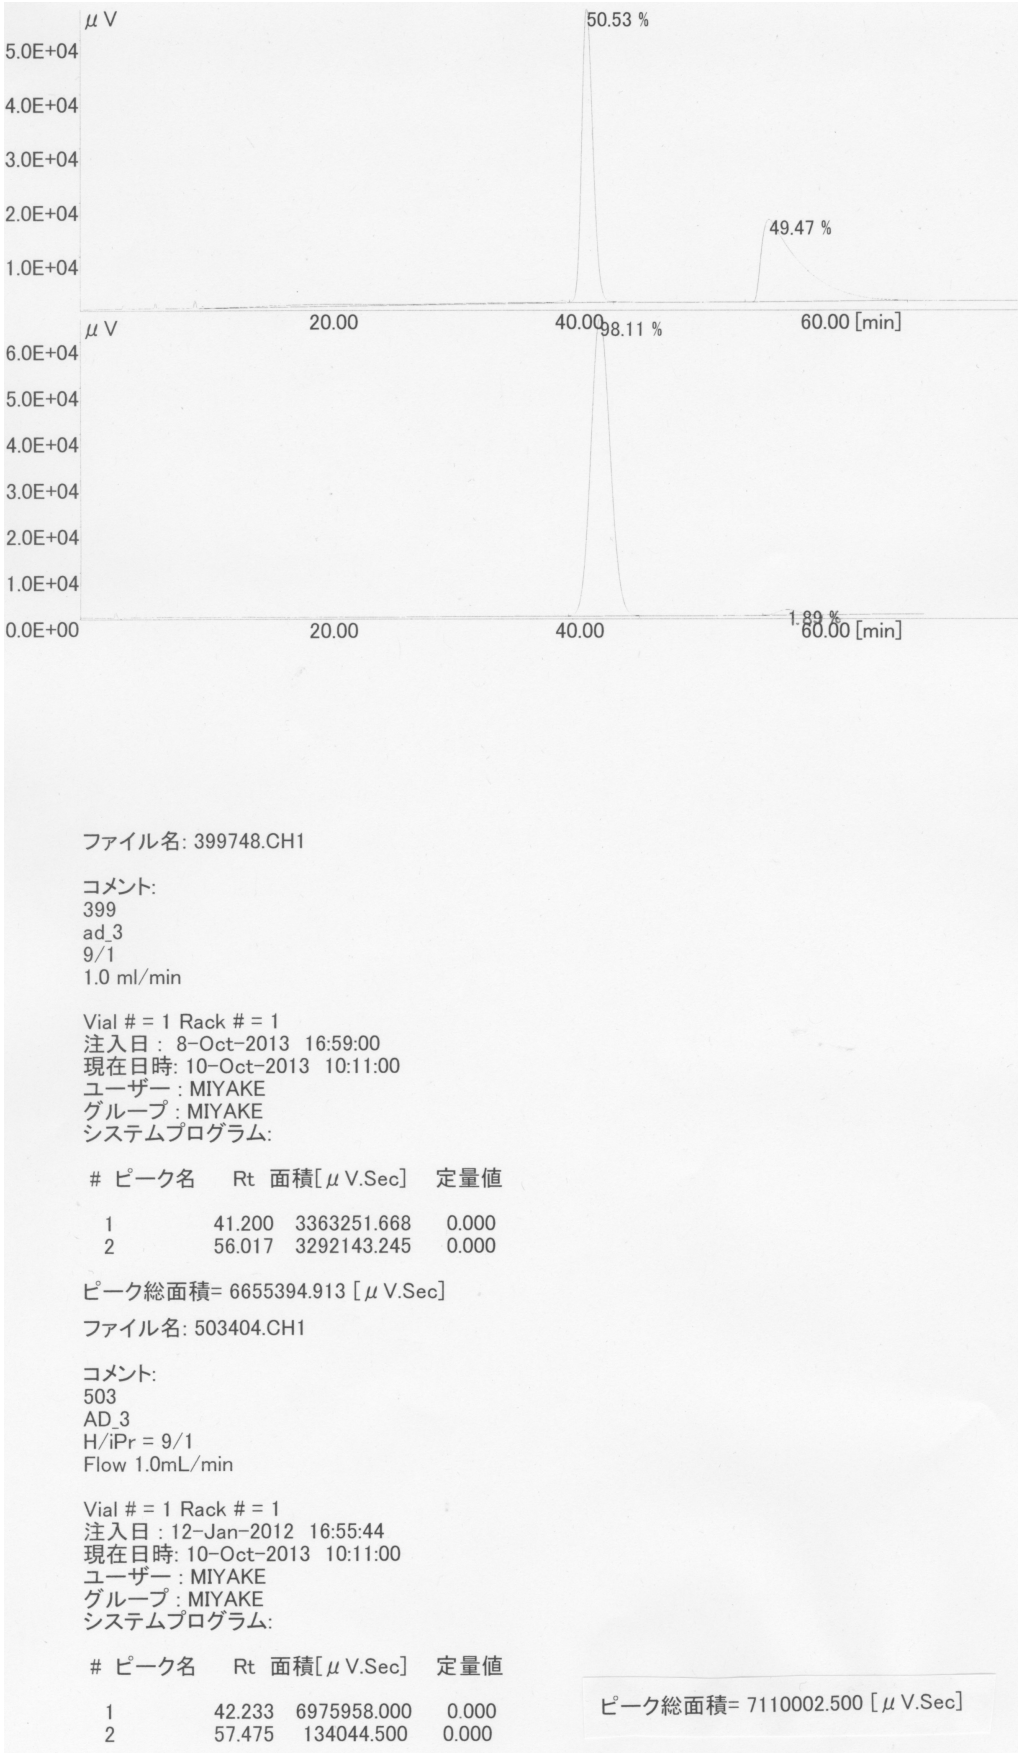

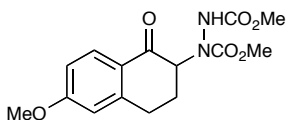

**Dimethyl 1-(6-methoxy-1-oxo-1,2,3,4-tetrahydronaphthalen-2-yl)hydrazine-1,2-dicarboxylate (3da, Table 3, entry 5)**

<sup>1</sup>H NMR spectra

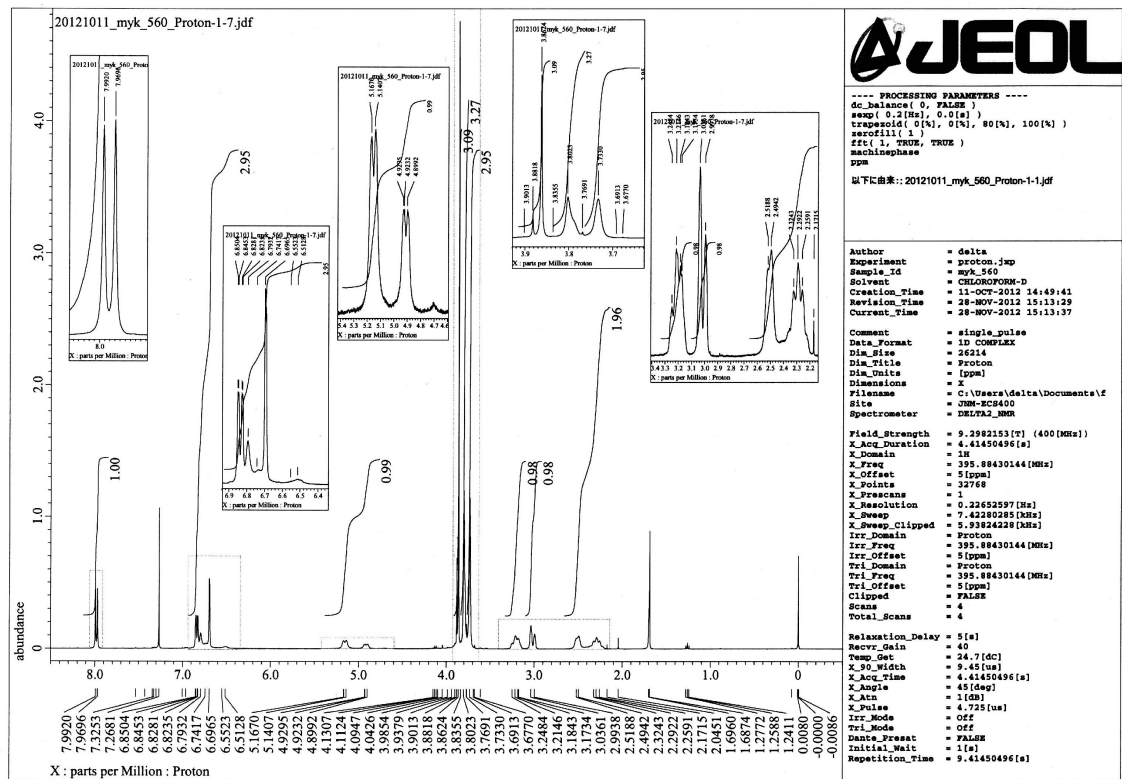

<sup>13</sup>C NMR spectra

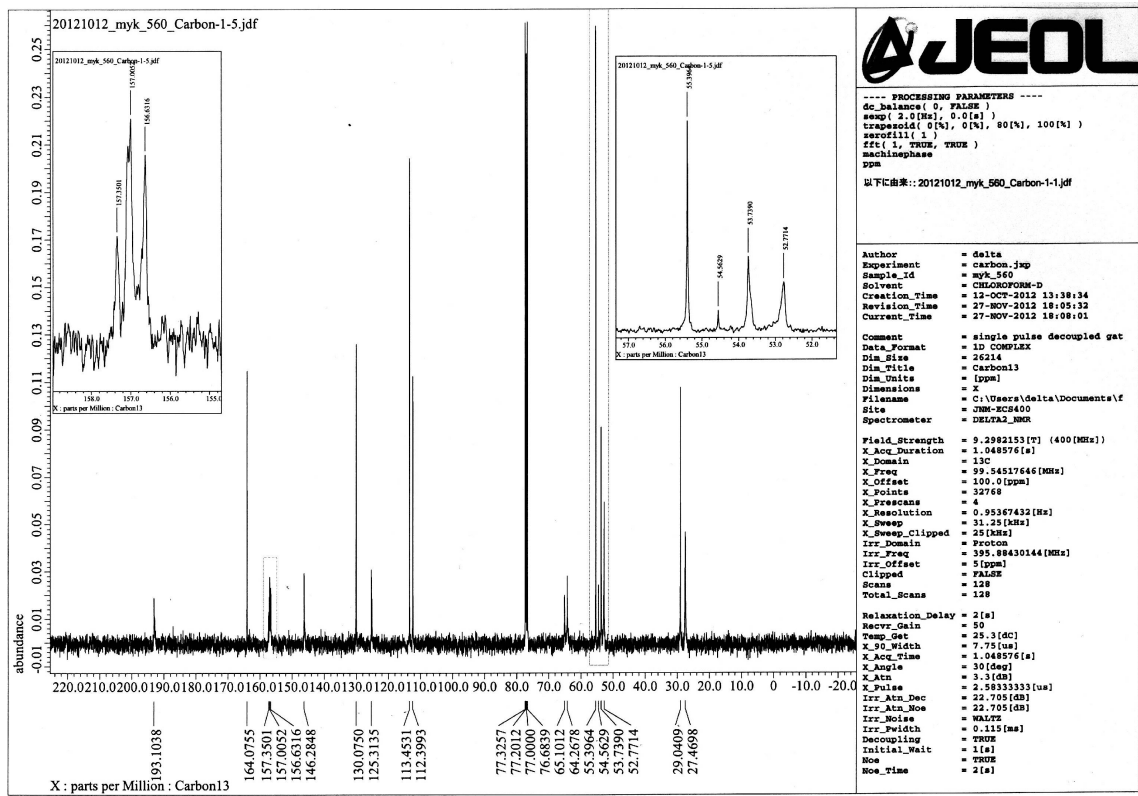



HPLC Chart

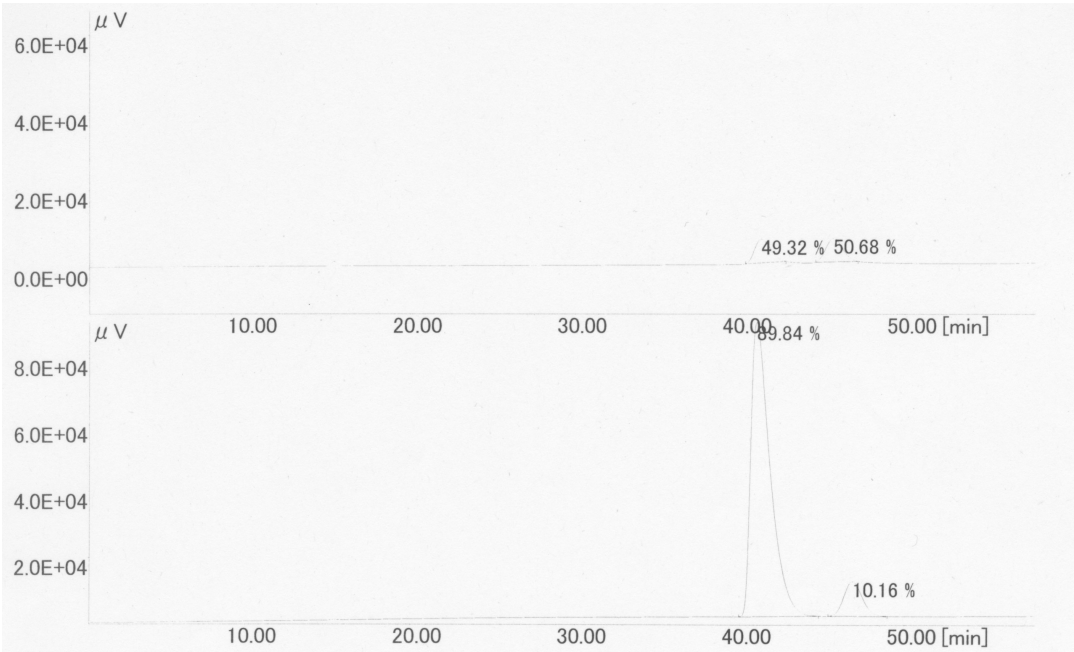

ファイル名: 396596.CH1

コメント:

396

ad\_3\_ad\_h

H/iPr = 3/1

Flow 1.0mL/min

Vial # = 1 Rack # = 1

注入日: 21-Nov-2012 11:13:34

現在日時: 27-Nov-2012 10:33:00

ユーザー: MIYAKE

グループ: MIYAKE

システムプログラム:

| # | ピーク名 | Rt     | 面積[μ V.Sec] | 定量値   |
|---|------|--------|-------------|-------|
| 1 |      | 41.283 | 406338.250  | 0.000 |
| 2 |      | 45.650 | 417473.500  | 0.000 |

ピーク総面積= 823811.750 [μ V.Sec]

ファイル名: 916595.CH1

コメント:

916

ad\_3\_ad\_h

H/iPr = 3/1

Flow 1.0mL/min

Vial # = 1 Rack # = 1

注入日: 21-Nov-2012 10:12:42

現在日時: 27-Nov-2012 10:33:00

ユーザー: MIYAKE

グループ: MIYAKE

システムプログラム:

| # | ピーク名 | Rt     | 面積[μ V.Sec] | 定量値   |
|---|------|--------|-------------|-------|
| 1 |      | 41.025 | 7043375.000 | 0.000 |
| 2 |      | 46.842 | 796658.250  | 0.000 |

ピーク総面積= 7840033.250 [μ V.Sec]

<sup>1</sup>H NMR spectra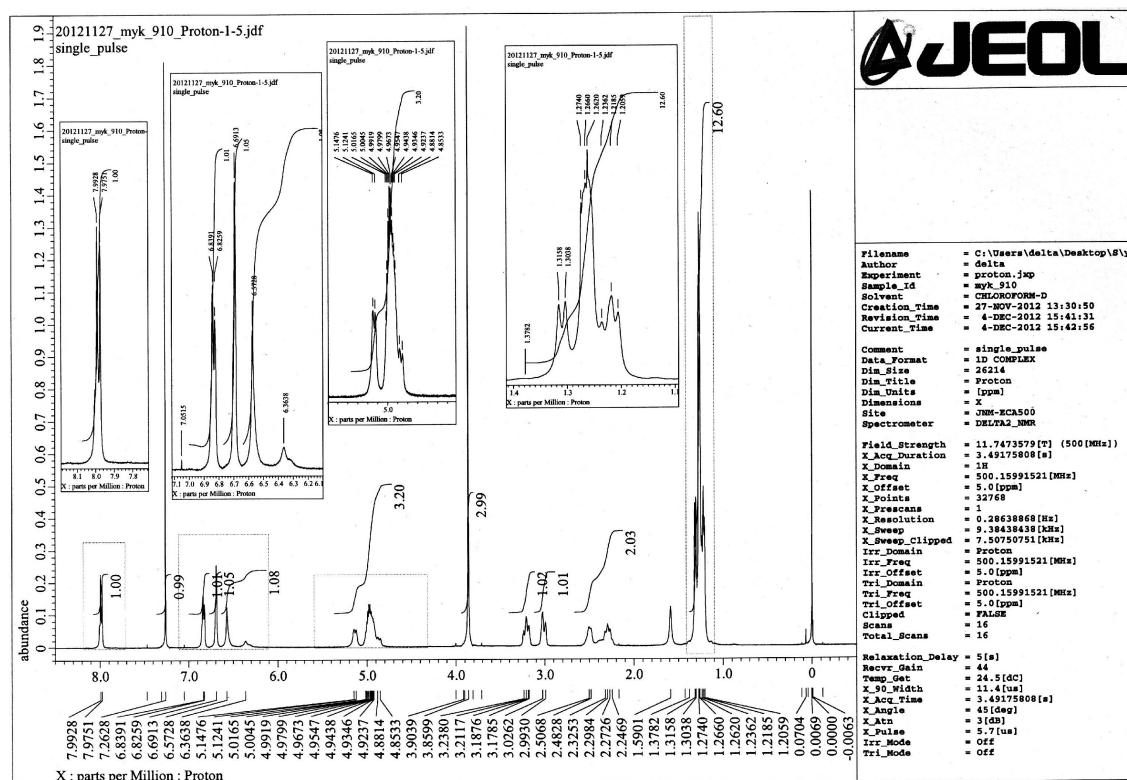20121113\_myk\_910\_Carbon-1-11.jdf  
single pulse decoupled gated NOE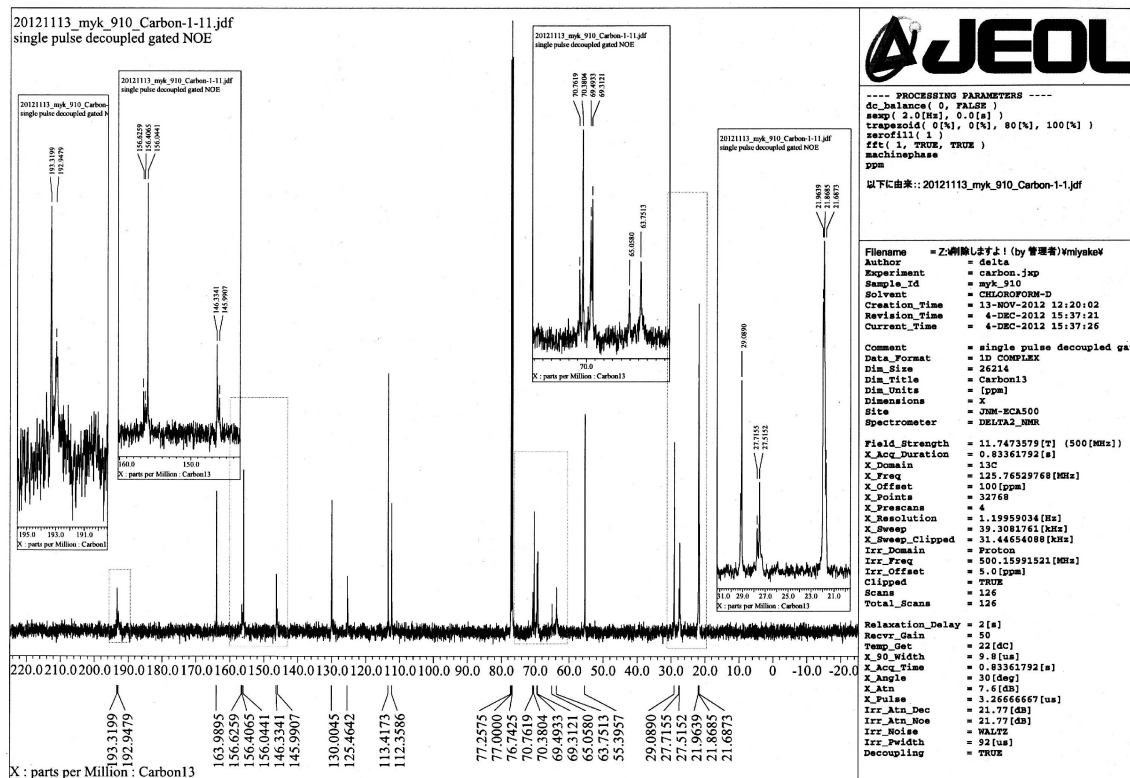

HPLC Chart

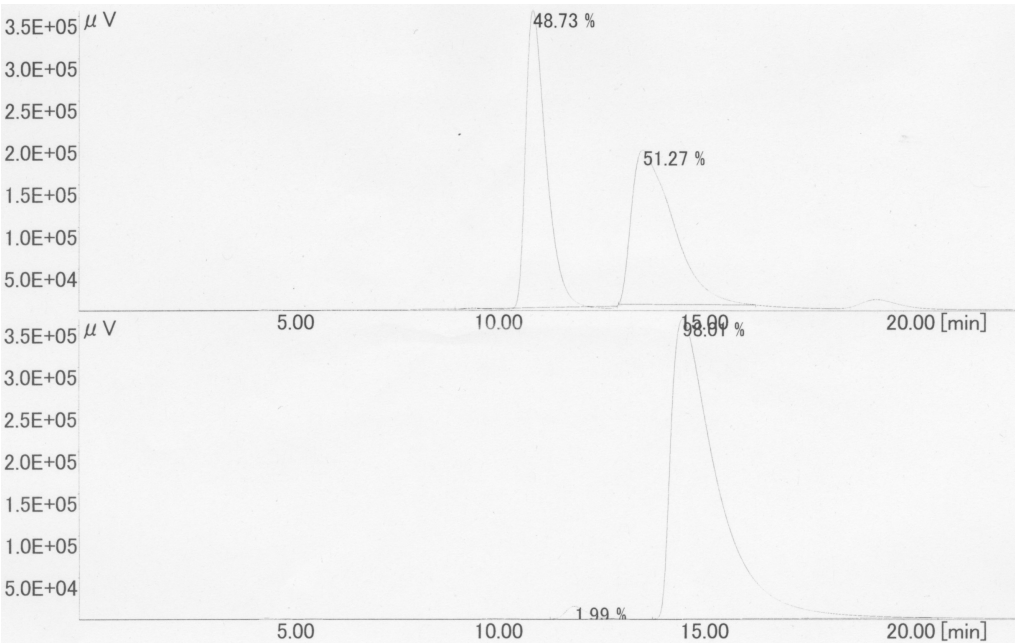

ファイル名: 236387.CH1

コメント:

236

OD\_H

H/iPr = 9/1

Flow 0.7mL/min

Vial # = 1 Rack # = 1

注入日: 5-Jan-2012 12:40:36

現在日時: 10-Oct-2013 10:37:04

ユーザー: MIYAKE

グループ: MIYAKE

システムプログラム:

| # | ピーク名 | Rt     | 面積[ $\mu V \cdot Sec$ ] | 定量値   |
|---|------|--------|-------------------------|-------|
| 1 |      | 11.017 | 12177013.311            | 0.000 |
| 2 |      | 13.683 | 12813421.500            | 0.000 |

ピーク総面積= 24990434.811 [ $\mu V \cdot Sec$ ]

ファイル名: 502411.CH1

コメント:

502

OD\_H

H/iPr = 9/1

Flow 0.7mL/min

Vial # = 1 Rack # = 1

注入日: 13-Jan-2012 3:05:36

現在日時: 10-Oct-2013 10:37:04

ユーザー: MIYAKE

グループ: MIYAKE

システムプログラム:

| # | ピーク名 | Rt     | 面積[ $\mu V \cdot Sec$ ] | 定量値   |
|---|------|--------|-------------------------|-------|
| 1 |      | 12.025 | 563343.000              | 0.000 |
| 2 |      | 14.650 | 27728015.872            | 0.000 |

ピーク総面積= 28291358.872 [ $\mu V \cdot Sec$ ]



<sup>1</sup>H NMR spectra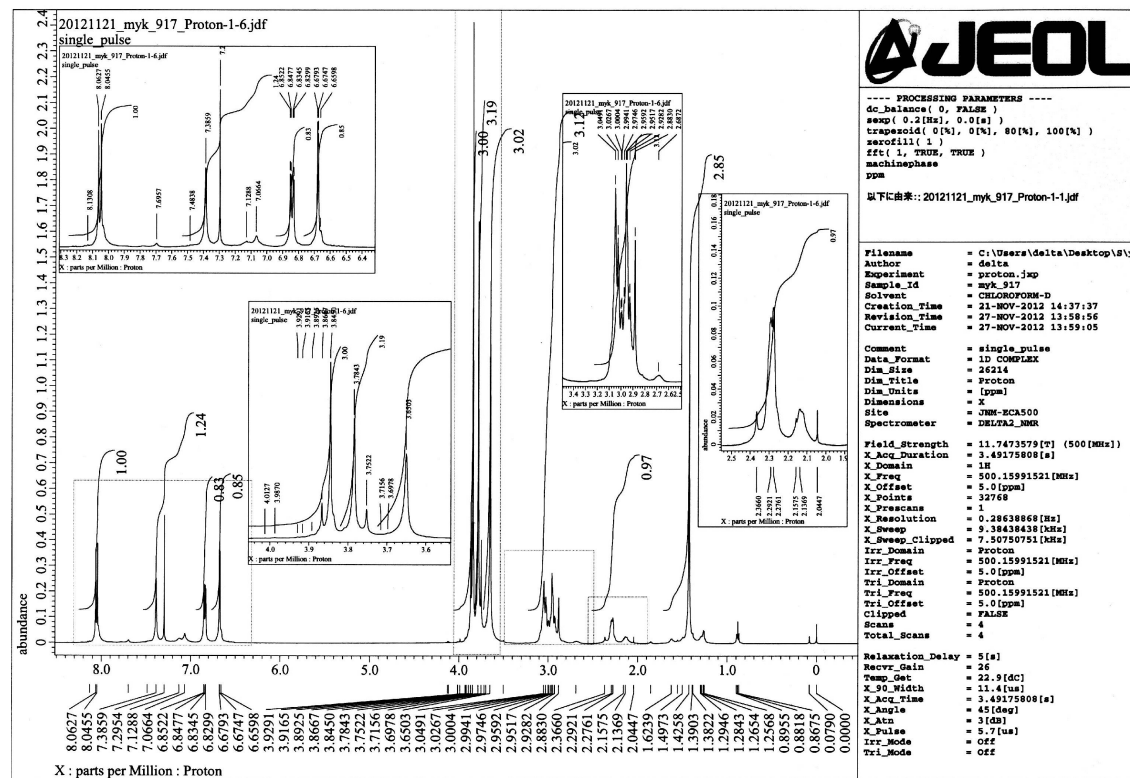<sup>13</sup>C NMR spectra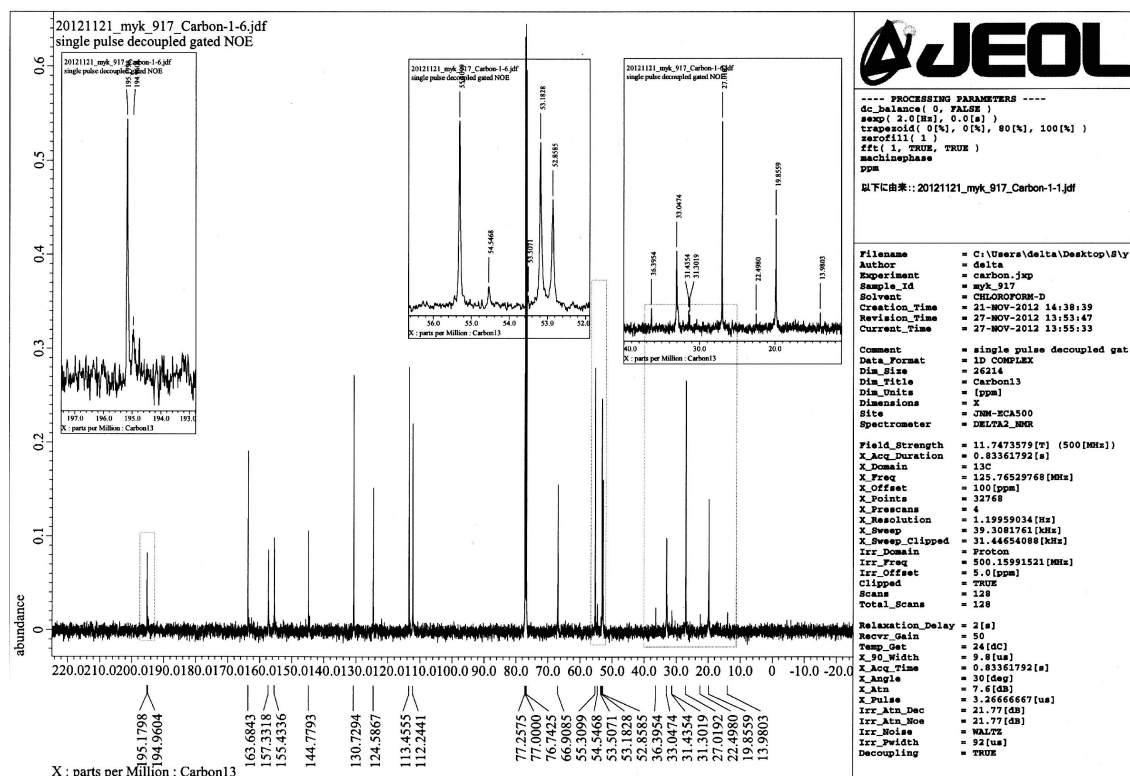

HPLC Chart

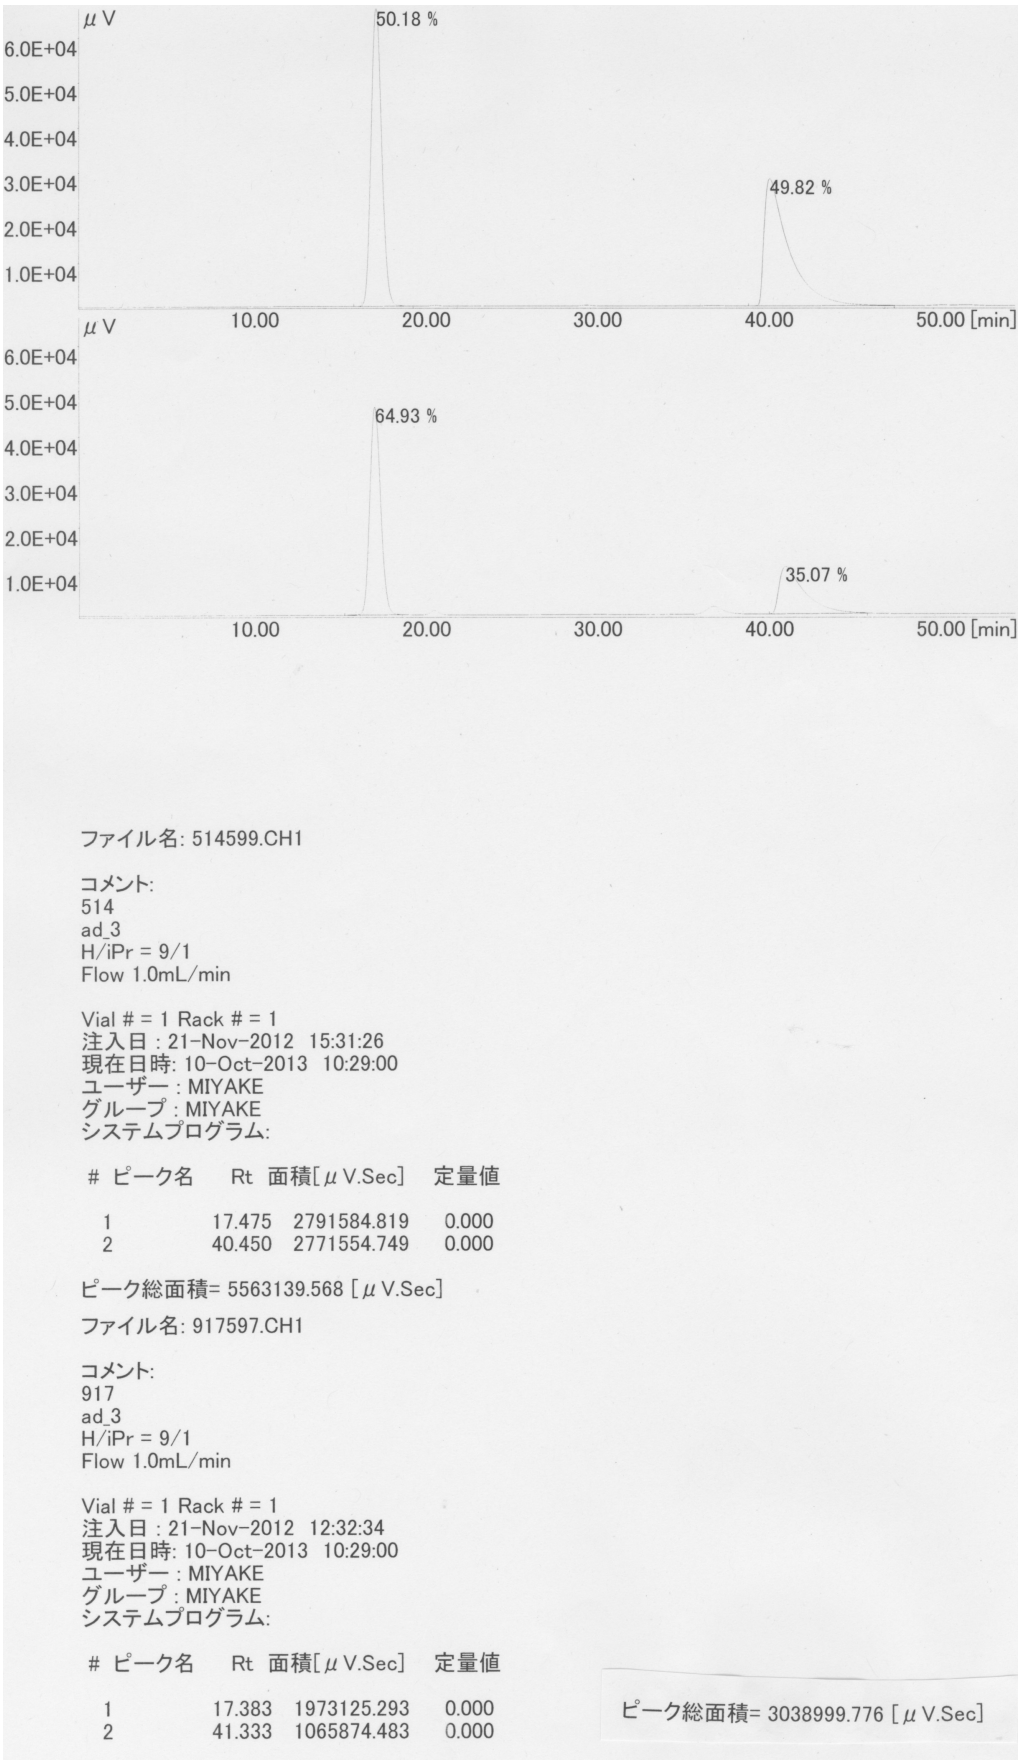

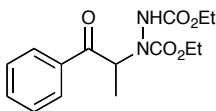

(S)-Diethyl 1-(1-oxo-1-phenylpropan-2-yl)hydrazine-1,2-dicarboxylate (3fb,  
Table 3, entry 8)

<sup>1</sup>H NMR spectra

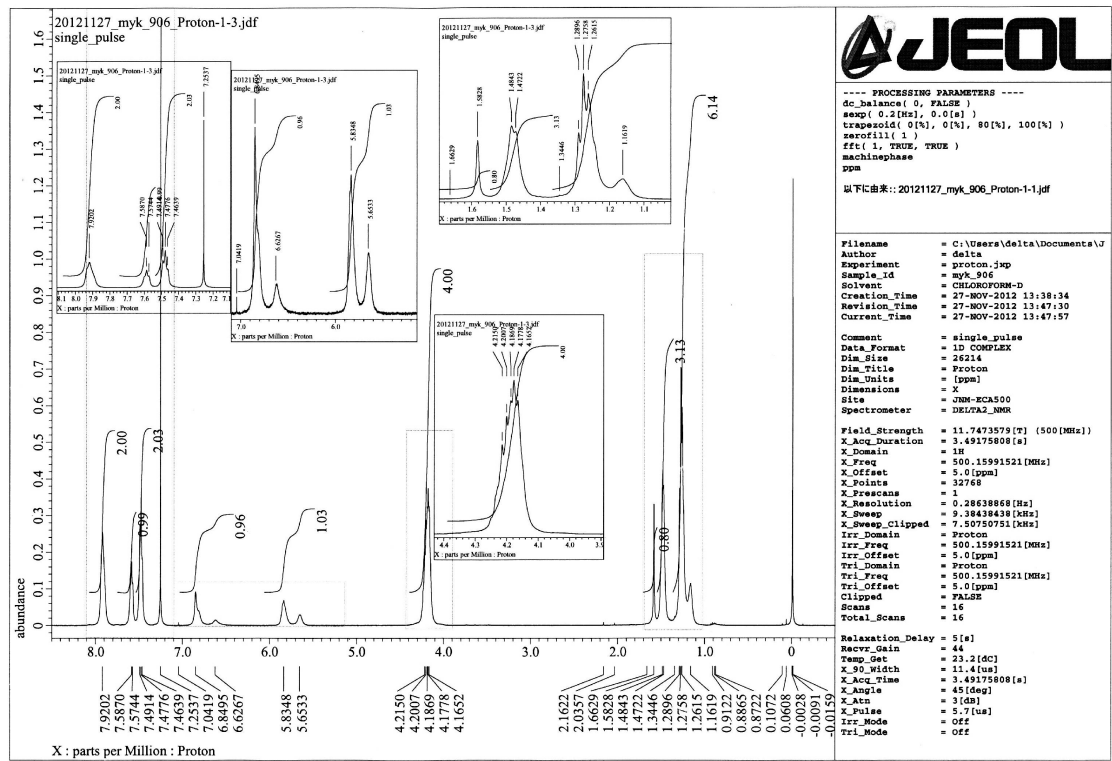

<sup>13</sup>C NMR spectra

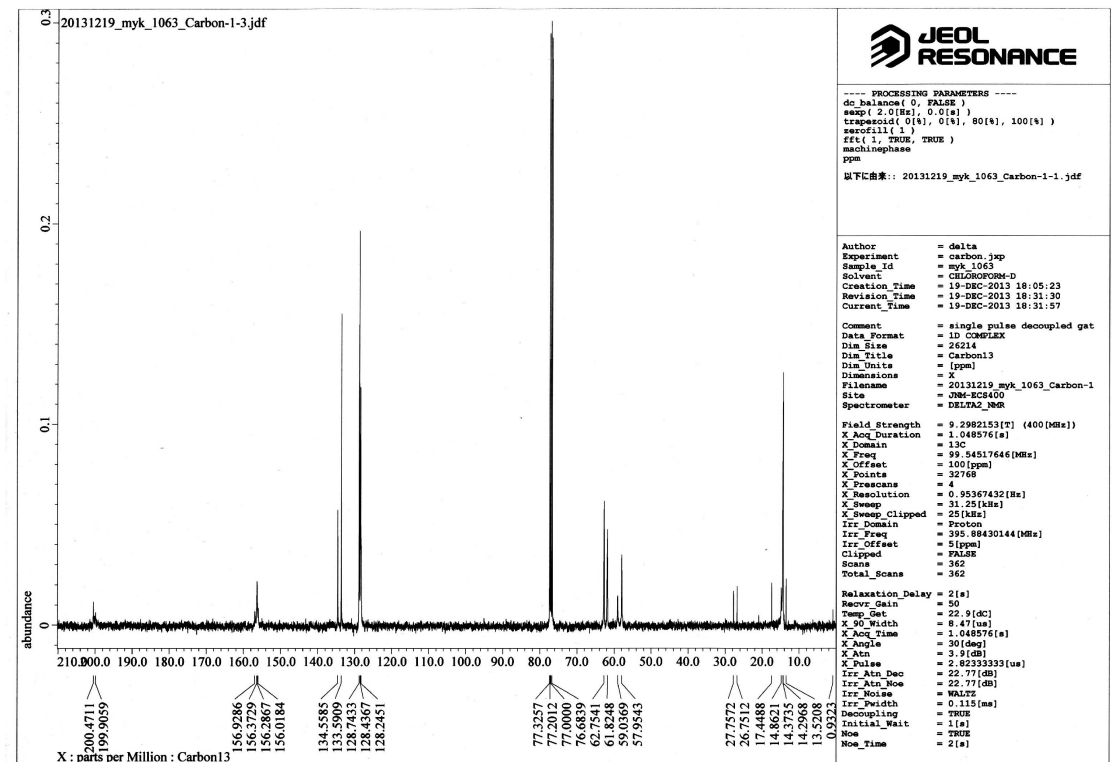



# HPLC Chart

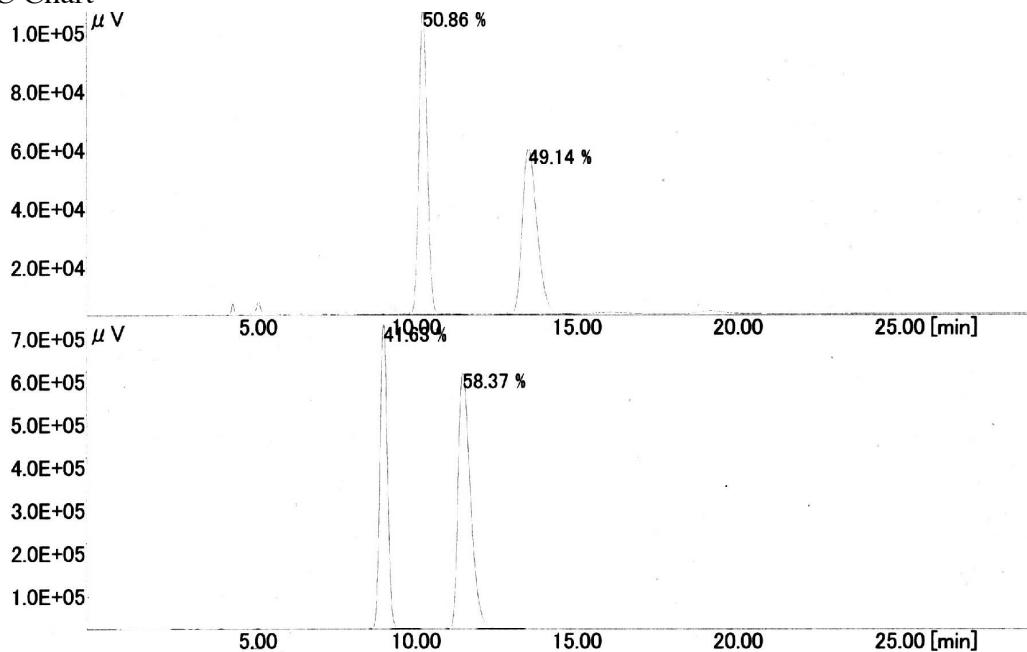

ファイル名: 030\_1777.CH1

コメント:

030

ad\_3

3/1

1.0 ml/min

Vial # = 1 Rack # = 1

注入日 : 17-Dec-2013 19:03:26

現在日時: 27-Dec-2013 14:09:08

ユーザー : MIYAKE

グループ : MIYAKE

システムプログラム:

| # | ピーク名 | Rt     | 面積[μ V.Sec] | 定量値   |
|---|------|--------|-------------|-------|
| 1 |      | 10.442 | 1832765.168 | 0.000 |
| 2 |      | 13.717 | 1770756.000 | 0.000 |

ピーク総面積= 3603521.168 [μ V.Sec]

ファイル名: 918594.CH1

コメント:

918

ad\_3

H/iPr = 3/1

Flow 1.0mL/min

Vial # = 1 Rack # = 1

注入日 : 16-Nov-2012 16:14:04

現在日時: 27-Dec-2013 14:09:08

ユーザー : MIYAKE

グループ : MIYAKE

システムプログラム:

| # | ピーク名 | Rt     | 面積[μ V.Sec]  | 定量値   |
|---|------|--------|--------------|-------|
| 1 |      | 9.217  | 11070282.750 | 0.000 |
| 2 |      | 11.675 | 15522125.500 | 0.000 |

ピーク総面積= 26592408.250 [μ V.Sec]

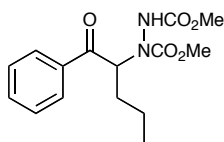

**Dimethyl 1-(1-oxo-1-phenylpentan-2-yl)hydrazine-1,2-dicarboxylate (3ga,**  
**Table 3, entry 9)**

<sup>1</sup>H NMR spectra

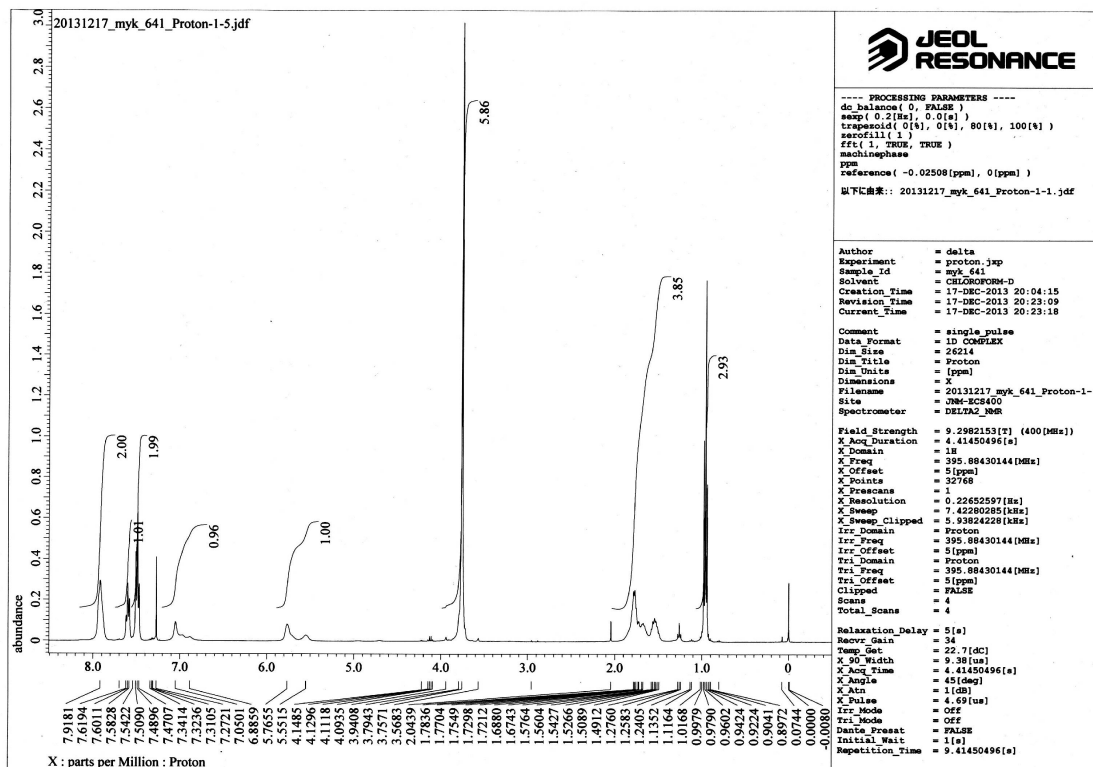

<sup>13</sup>C NMR spectra

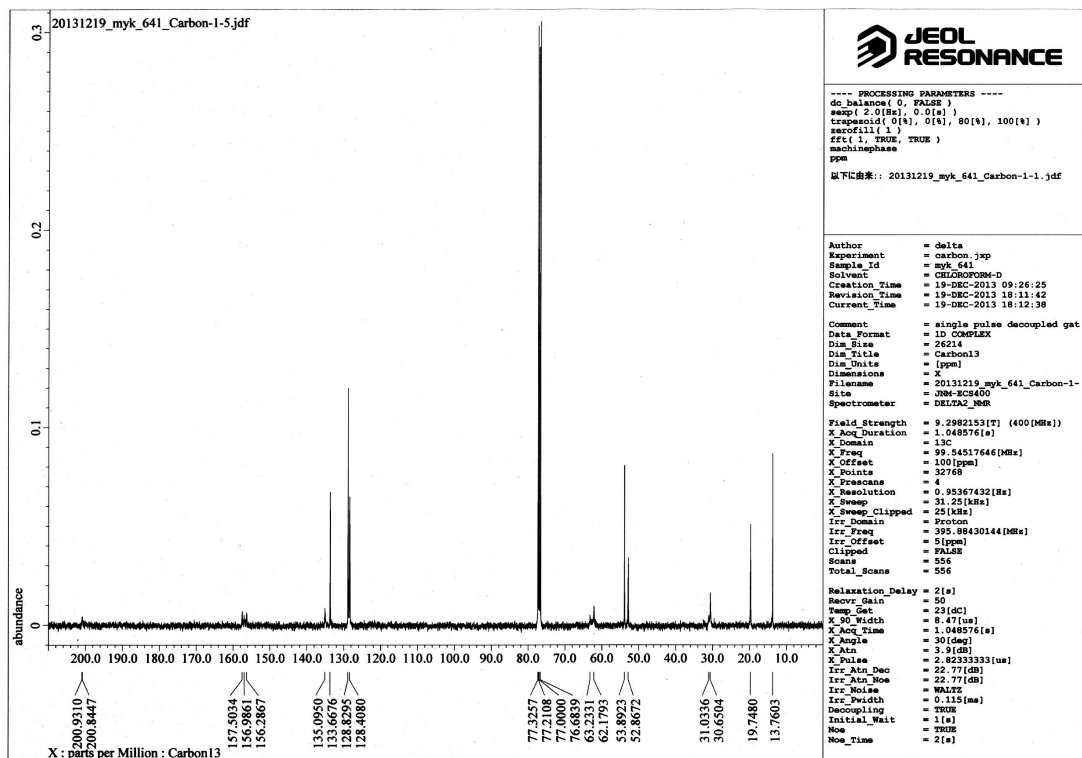

HPLC Chart

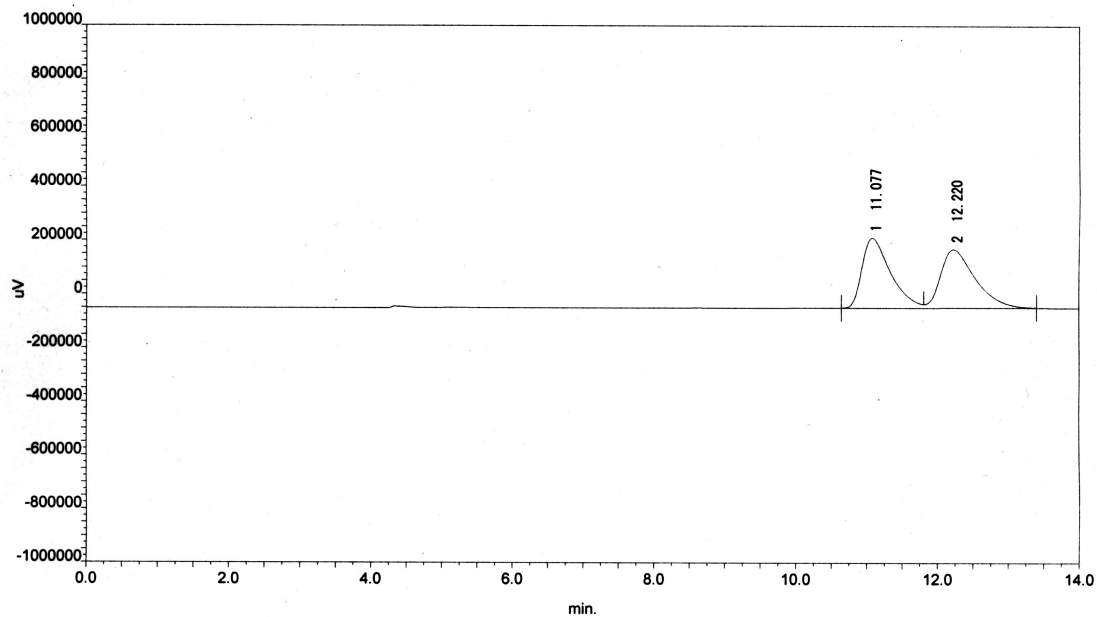

解析結果

| No. | Rt(min) | ピーク名 | 面積           | 面積(%)    | 高さ     | NTP    | 対称性   | 分離度   |
|-----|---------|------|--------------|----------|--------|--------|-------|-------|
| 1   | 11.08   |      | 7269428.818  | 49.5760  | 259943 | 3548.6 | ----- | 1.388 |
| 2   | 12.22   |      | 7393762.182  | 50.4240  | 217568 | 2924.7 | ----- | ----- |
|     |         |      | 14663191.000 | 100.0000 | 477511 |        |       |       |

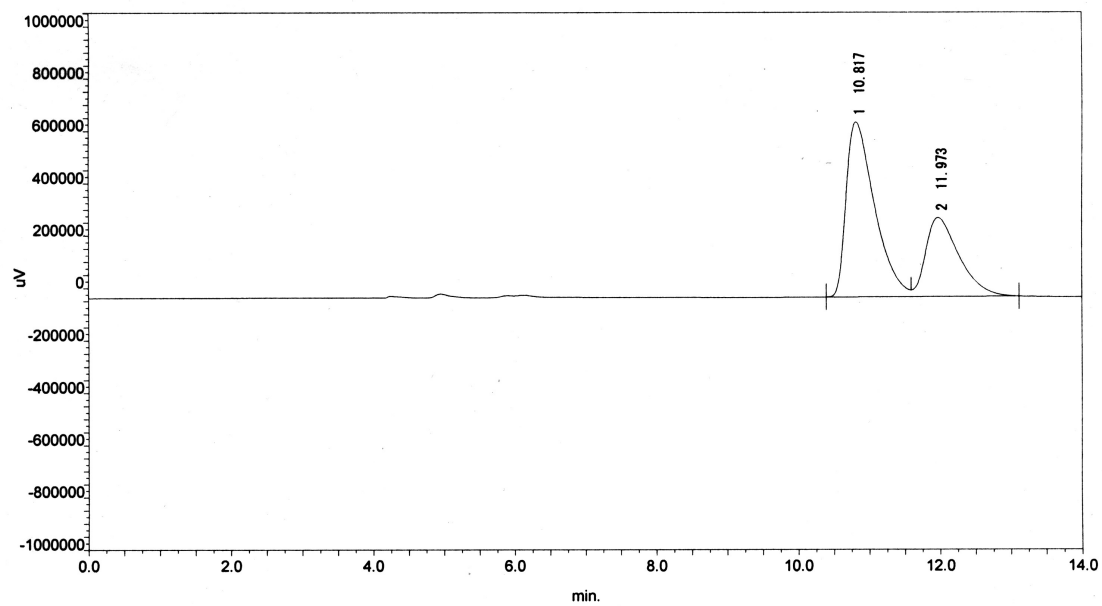

解析結果

| No. | Rt(min) | ピーク名 | 面積           | 面積(%)    | 高さ     | NTP    | 対称性   | 分離度   |
|-----|---------|------|--------------|----------|--------|--------|-------|-------|
| 1   | 10.82   |      | 18612502.949 | 65.4289  | 667640 | 3405.2 | 1.788 | 1.438 |
| 2   | 11.97   |      | 9834424.051  | 34.5711  | 301411 | 3046.0 | ----- | ----- |
|     |         |      | 28446927.000 | 100.0000 | 969051 |        |       |       |
